# Supplementary material for: Impact of workplace violence and compassionate behaviour in hospitals on stress, sleep quality and subjective health status among Chinese nurses: a cross-sectional survey
Source: PubMed Central journal article supplement — BMJ Open. 2018 Oct 3;8(10):e019373. doi: 10.1136/bmjopen-2017-019373 (PMC6194400; doi:10.1136/bmjopen-2017-019373), 2018-10-03
Supplement: bmjopen-2017-019373.draft_revisions.pdf [file bmjopen-2017-019373.draft_revisions.pdf]

# BMJ Open

BMJ Open is committed to open peer review. As part of this commitment we make the peer review history of every article we publish publicly available.

When an article is published we post the peer reviewers' comments and the authors' responses online. We also post the versions of the paper that were used during peer review. These are the versions that the peer review comments apply to.

The versions of the paper that follow are the versions that were submitted during the peer review process. They are not the versions of record or the final published versions. They should not be cited or distributed as the published version of this manuscript.

BMJ Open is an open access journal and the full, final, typeset and author-corrected version of record of the manuscript is available on our site with no access controls, subscription charges or pay-per-view fees (<http://bmjopen.bmj.com>).

If you have any questions on BMJ Open's open peer review process please email [editorial.bmjopen@bmj.com](mailto:editorial.bmjopen@bmj.com)

# BMJ Open

## Impact of Workplace Violence and Compassion in Hospital on Stress, Sleeping Quality and Subjective Health Status among Chinese nurses : A Cross-sectional Survey

|                                 |                                                                                                                                                                                                                                                                                                                                                                                                                                                                                                                                                                                                                            |
|---------------------------------|----------------------------------------------------------------------------------------------------------------------------------------------------------------------------------------------------------------------------------------------------------------------------------------------------------------------------------------------------------------------------------------------------------------------------------------------------------------------------------------------------------------------------------------------------------------------------------------------------------------------------|
| Journal:                        | <i>BMJ Open</i>                                                                                                                                                                                                                                                                                                                                                                                                                                                                                                                                                                                                            |
| Manuscript ID                   | bmjopen-2017-019373                                                                                                                                                                                                                                                                                                                                                                                                                                                                                                                                                                                                        |
| Article Type:                   | Research                                                                                                                                                                                                                                                                                                                                                                                                                                                                                                                                                                                                                   |
| Date Submitted by the Author:   | 30-Aug-2017                                                                                                                                                                                                                                                                                                                                                                                                                                                                                                                                                                                                                |
| Complete List of Authors:       | Liu, Wenhui; Harbin Medical University School of Public Health<br>Zhang, Shue; The Third Affiliated Hospital of Harbin Medical University<br>Wang, Jinghui; Harbin Medical University School of Public Health<br>Shi, Yu; Harbin Medical University School of Public Health<br>Xie, Fengzhe; Harbin Medical University School of Public Health<br>Cang, Shuang; Medical Examination Center of the 2nd affiliated hospital of Harbin Medical University<br>Sun, Tao; Harbin Medical University School of Public Health,<br>Fan, Lihua; Harbin Medical University, Department of Health Management , School of Public Health |
| <b>Primary Subject Heading</b>: | Health policy                                                                                                                                                                                                                                                                                                                                                                                                                                                                                                                                                                                                              |
| Secondary Subject Heading:      | Mental health, Nursing                                                                                                                                                                                                                                                                                                                                                                                                                                                                                                                                                                                                     |
| Keywords:                       | Workplace violence, Chinese Nurses, Compassion, Sleeping Quality, Subjective Health Status                                                                                                                                                                                                                                                                                                                                                                                                                                                                                                                                 |
|                                 |                                                                                                                                                                                                                                                                                                                                                                                                                                                                                                                                                                                                                            |

SCHOLARONE™  
Manuscripts

# Impact of Workplace Violence and Compassion in Hospital on Stress, Sleeping Quality and Subjective Health Status among Chinese nurses: A Cross-sectional Survey

Wenhui Liu<sup>†</sup>, Shu-E Zhang<sup>†</sup>, Jinghui Wang, Yu Shi, Fengzhe Xie, Shuang Cang, Tao Sun\* and Lihua Fan\*

Wenhui Liu: Department of Health Management, School of Public Health, Harbin Medical University, Harbin 150081, China

Shu-E Zhang: Department of Pharmacy, Harbin Medical University Cancer Hospital, Harbin 150081, China

Jinghui Wang: Department of Health Management, School of Public Health, Harbin Medical University, Harbin 150081, China

Yu Shi: Department of Health Management, School of Public Health, Harbin Medical University, Harbin 150081, China

Fengzhe Xie: Department of Health Management, School of Public Health, Harbin Medical University, Harbin 150081, China

Shuang Cang: Department of Medical Examination Center, the Second Affiliated Hospital of Harbin Medical University, Harbin 150081, China

Tao Sun: Department of Health Management, School of Public Health, Harbin Medical University, Harbin 150081, China

Lihua Fan: Department of Health Management, School of Public Health, Harbin Medical University, Harbin 150081, China

<sup>†</sup>These authors contributed equally to this work.

\*Correspondence: Tao Sun, School of Public Health, Harbin Medical University, Baojian Road 157, Harbin, China, E-mail: hyduntao@126.com, Tel: +86-137-6688-2425; Lihua Fan, School of Public Health, Harbin Medical University, Baojian Road 157, Harbin, China, E-mail: lihuafan@126.com, Tel.: +86-131-3666-1393

**Keywords:** Workplace violence; Chinese Nurses; Compassion; Sleeping Quality; Subjective Health Status

## Abstract

**Objectives:** The aims of this study are to describe the current state of workplace violence (WPV) against nurses, and to survey the state of compassion care in hospital, and to explain how they affects nurses' stress, sleep quality and subjective health status.

**Design:** A cross-sectional online survey study.

**Setting:** The survey was conducted across 30 provinces of China.

**Participants:** A total of 1024 nurses were recruited to complete an online questionnaire survey during May 2016 in China.

**Results:** Of the participants, approximately 75.4% participates had suffered some forms of violence. Most

1  
2  
3 of the participants experienced workplace violence followed by verbal violence (65.2%), made difficulties  
4  
5 (53.9%), smear reputation (38.1%), mobbing behavior (34.5%), menace behavior (18.6%), physical  
6  
7 violence (14.4%) and sexual harassment (5.8%). In this study, 92.2% of the participants experienced the  
8  
9 compassion from their co-workers (14.6%), their supervisors (30.3%) and on the job (47.4%). The results  
10  
11 revealed that the exposure to WPV and experienced compassion significantly affected psychological stress,  
12  
13 sleep quality and subjective health of nurses. Moreover, the psychological stress played a partly mediating  
14  
15 role in relationship between work-related violence and health outcome, and played a partly mediating role  
16  
17 in relationship between work-related compassion and health outcome.  
18  
19  
20  
21  
22

23 **Conclusion:** In China, most nurses have suffered different forms of WPV from patients or their relatives,  
24  
25 while they experienced various compassion from their co-workers or supervisors or patients. The  
26  
27 prevalence of different new types of WPV and compassion has been investigated in our study. The several  
28  
29 harms on nurses from exposure to violence is confirmed. We found that WPV could damage the nurses'  
30  
31 health outcomes, while the compassion were beneficial to the nurses' health outcomes. A harmonious  
32  
33 nursing environment should be provided to minimize the nurse health threats.  
34  
35  
36

### 37 **Strengths and limitations of this study**

38  
39  
40 The prevalence of different types of workplace violence and compassion is conducted among nurses in  
41  
42 China.  
43  
44

45 This is the first study investigating the relationship between workplace violence, compassion and  
46  
47 psychological stress, sleep quality, and self-reported health of nurses in China.  
48  
49

50 The approach to self-reports of nurses by an online survey may resulted in response bias

51  
52 Causation is unable to be established due to cross-sectional study design.  
53  
54  
55  
56  
57  
58  
59  
60

## Introduction

Nursing environment directly affects the quality of care and enhances the threat of patient safety owing to nursing errors<sup>1</sup>. Currently, workplace violence (WPV) has rapidly increased in the health institutions<sup>2</sup>, the patients and their relatives violence is the highest nurse risk, because of contacting with patients frequently and facing medical disputes directly. WPV characteristics include all the threatening act, verbal threat, physical assault, or sexual assault which is launched by any patients and their relatives, or any other individual against medical employees that poses a risk to them<sup>3</sup>. Either of violence has the negative implications to nurses' health and safety<sup>4,5</sup> and threatens the quality of patient care<sup>6</sup>. Thus, WPV exacerbates the high-pressure work environment, resulting in very serious health problems among nurses. Likewise, WPV intensifies with the nurses work stress that influence their health.

Due to their work environment character, nursing is a more psychological stress and suffering professional.<sup>7,8</sup> While, compassion at work is associated with more frequent positive emotion and heightened affect commitment<sup>9</sup>. Peter J. Frost identified compassion as comprised of three interrelated elements: noticing another suffering, feeling empathy for the other's pain<sup>10</sup>, and responding to the suffering in some way, and compassion came from their client, supervisors and co-workers<sup>11</sup>. Previous studies found that nurses frequently felt that their supervisors and co-workers were willing to listen to them and empathize with their negative emotions and their distress. Nurses beget the positive moods that arises from this compassion could effectively increase job performance and OCB. The effects of compassion contribute to an organization's capability for cooperation. As suggested in the medical and nursing literatures, the compassion as a moral appears<sup>12</sup>. Compassion is seen as an essential component of patient care, while we often ignored the nurse as a special group, who is directly related to the recognition and treatment of patient suffering, which is supposed to be concerned. The compassion delivered by their

1  
2  
3 patients, supervisors and co-workers may have effect on the health outcomes of hospital nurses.  
4

5  
6 The work environment influence the nurses' stress that affects the practice worldwide and nurse-patient  
7 relationship<sup>13</sup>. The frequency and form of the nurse facing patients might lead to experience different  
8 forms of violence, while accepting different forms of compassion at work. Nurses suffer more risk of work  
9 stress that come from the work experience, who often undergo the gastrointestinal discomfort and sleep  
10 disorders<sup>1</sup>. A Swedish research reported that 80% of nurses had high or very high levels of stress<sup>13</sup>. The  
11 effect of stress has been considered, it is an important cause of decreasing health outcome of nurses and  
12 nursing quality<sup>14</sup>. Bang, Young Eun, Park, Bohyun found that nursing work environment was slightly  
13 negative, and showed that the nursing work environment and nurses' stress were factors affecting their  
14 health problems<sup>15</sup>. Nurses may neglect their job requirements and inadvertent medical errors can be caused  
15 when psychological stress is accumulated for long periods<sup>1</sup>. Psychological stress of nurses not only  
16 damaged their own health but also lead to a negative impact on patients heal in some way<sup>16</sup>.  
17  
18  
19  
20  
21  
22  
23  
24  
25  
26  
27  
28  
29  
30  
31

32 Sleep quality is a person's assessment of his/her sleep related characteristics and whether these qualities  
33 are satisfactory<sup>13</sup>. Besides, self-perceived physical health served as the predictors for psychological  
34 health<sup>13</sup>. Subjective sleep quality and subjective health status were a person's overall health evaluation.  
35 Both of them have effects on the nurse-patient relationship, organization development, patient satisfaction  
36 and so on<sup>17</sup>. Nurses influenced by WPV with high status of stress work, tend to report poorer  
37 self-perceived health<sup>18</sup>, which was 20% more likely to suffer from poor sleep quality than those with low  
38 stress<sup>1</sup>. Some nurses who experiencing workplace violence, might tend to react with fewer negative  
39 emotions, such as worry anxiety fear, and then caused the low level status of subjective health. While  
40 others may experience emotional imbalance, more anxiety, irritability, insomnia and depression, and then  
41 influenced their sleep quality, and simultaneously destroyed their health. However, compassion is  
42  
43  
44  
45  
46  
47  
48  
49  
50  
51  
52  
53  
54  
55  
56  
57  
58  
59  
60

1  
2  
3 associated with a variety of positive emotions which relieve nurses' work pressure<sup>9</sup>, and then maintain a  
4 pleasant working state. Work environment has a far-reaching influence on the nurses<sup>19</sup>, which affects the  
5  
6 nurses' health<sup>16</sup>, WPV and compassion work environment could arouse different emotion experiences  
7  
8 among nurses, further to cause their different subjective health estimated results.  
9  
10

11  
12  
13 In this study we try to investigate the current status of WPV and compassion in hospital, and we conducted  
14  
15 a cross-sectional study to investigate the frequency of workplace violence and to probe into the  
16  
17 relationship of these variables, attempt to analyze the mechanism of how WPV and compassion effects on  
18  
19 the health outcomes towards hospital nurses of China, whether the stress mediate the positive relationship  
20  
21 between experiencing WPV or compassion at work and healthy outcome.  
22  
23

## 24 25 **Methods**

### 26 27 **Subjects and procedures**

28  
29 This is a cross-sectional descriptive study, which was conducted during March 2016 across 30 provinces  
30  
31 of China.  
32  
33

34  
35 An anonymous online questionnaire was completed by nurses throughout the country during February  
36  
37 2016 in China. This cross-sectional study was conducted across 30 provinces of China. First,  
38  
39 approximately 30 nurses from the authors' unit were selected as the original deliverers of the survey.  
40  
41 Subsequently, the colleagues or classmates of "the original deliverers" were invited to participate in our  
42  
43 online survey. A web page linked to our questionnaire-survey (<https://www.wenjuan.com/>) was sent by  
44  
45 mobile phone to subjects during nurses' rest breaks. Moreover, the questionnaires were self-administered.  
46  
47  
48 A total of 1362 nurses were invited in this survey. Ultimately, 1034 valid questionnaires were used in the  
49  
50 final data analysis. The effective response rate was 75.9%.  
51  
52  
53

### 54 55 **Ethics**

1  
2  
3 The research described in present article meets the ethical guidelines of the ethics committee of the  
4  
5  
6 College of Public Health, Harbin Medical University, and the project has been approved by the Ethics  
7  
8  
9 Committee of the Harbin Medical University (ECHMU). The written informed consent can't be received  
10  
11 because of anonymous survey approach, hence, oral informed consent for survey was approved by the  
12  
13 ECHMU and obtained from each doctor, once a questionnaire was completed we can think that the doctor  
14  
15 has orally agreed to participate in our survey by reference to the Wen's criteria<sup>20</sup>.

### 18 **Measures**

19  
20 Demographic variables: gender, age, work experience, marital status, professional position, education level  
21  
22 and so on.

### 25 **Measurement of the WPV ( $\alpha=0.85$ )**

26  
27  
28 To assess exposure to WPV, 7-items measure was used<sup>21</sup>. Nurses were provided with the following  
29  
30 instructions, "During the past years, have you been put in a situation where a COWORKER or  
31  
32 SUPERVISOR?" Responses were scored on a 5-point scale from 0 (never) to 6 (every day). Scale items  
33  
34 included the Verbal Violence, Made Difficulties, Smear Reputation, Mobbing Behavior, Intimidation  
35  
36 Behavior, Physical Violence and Sexual Harassment. According to the coding questionnaire, "never" and  
37  
38 "rarely" were coded as the non-experienced WPV from patients or relatives, so, those were assigned a  
39  
40 score of "0". Other situations were assigned as "1", representing the current state that nurses have  
41  
42 experienced the violence.  
43  
44  
45  
46

### 48 **Measurement of the compassion ( $\alpha=0.69$ )**

49  
50 We measured experienced compassion at work using three items developed by Lilius J M Respondents<sup>11</sup>  
51  
52 indicated on a 5-point Likert-type (1=never, 5=super frequently) scale how frequently they had  
53  
54 experienced compassion: (a) on the job, (b) from their supervisor, and (c) from their co-workers. High  
55  
56  
57  
58  
59



1  
2  
3  
4 scores indicate high levels of compassion.  
5

### 6 **Measurement of the psychological stress, sleep quality and subjective live health**

7

8 Single-item was adopted to measure psychological stress of nurses<sup>22</sup>. Namely, “current work ability  
9 compared with the lifetime best, with a possible score of 0=not at all, 5= very much”. High scores reflect  
10 the high levels of psychological stress. The past literature had confirmed that an item questionnaire had a  
11 high validity and sensitivity, also can measure the level of occupational expectation of new nurses<sup>23</sup>. Two  
12 single-items were addressed together to measure doctors self-reported health outcomes. Subjective sleep  
13 quality<sup>24</sup> was measured to use “How would you evaluate recent night’s sleep?”, the response format  
14 ranged from very bad (1) to very good (4) This study consulted a research of Fein and Skinne<sup>25</sup>, the overall  
15 subjective health was estimated by a widely used single-item measure (In general would you say your  
16 health is 4=excellent, 3=very good, 2=good, 1=fair, poor). High scores reflect high levels of health state.  
17  
18  
19  
20  
21  
22  
23  
24  
25  
26  
27  
28  
29

### 30 **Statistical analysis**

31

32 All analyses were addressed by using SPSS statistical software for Windows version 17.0 (SPSS, Inc.,  
33 Chicago, IL). Demographic characteristics of the nurses were collected to report sample information.  
34  
35 Pearson’s correlation coefficients were calculated to estimate correlations between the exposure to WPV  
36 and compassion, psychological stress, sleep quality, and self-subjective health. A series of hierarchical  
37 linear regression analyses were performed to examine our hypotheses according to a procedure that was  
38 suggested by Baron & Kenny .We provided data including F, R<sup>2</sup> and R<sup>2</sup>-changes, and the fit of the model  
39 was assessed with R<sup>2</sup>. Standardization regression coefficients ( $\beta$ ) and P values were calculated for each  
40 step in the regression model.Statistical significance was defined as P<0.05(two-tailed).  
41  
42  
43  
44  
45  
46  
47  
48  
49  
50  
51

### 52 **Results**

53

#### 54 **Demographic information for samples**

55  
56  
57  
58  
59  
60

A summary of demographic variables can be seen in Table 1.

**Table 1 Characteristics of the Respondents (n = 1034)**

| Characteristic                      | N   | %    |
|-------------------------------------|-----|------|
| Age                                 |     |      |
| 20-30                               | 709 | 68.6 |
| 31-40                               | 253 | 24.5 |
| 41-50                               | 49  | 4.7  |
| 51+                                 | 4   | 0.4  |
| Missing value                       | 19  | 1.8  |
| Gender                              |     |      |
| Male                                | 87  | 8.4  |
| Female                              | 936 | 90.5 |
| Missing value                       | 11  | 1.1  |
| Education                           |     |      |
| Technical secondary school or below | 38  | 3.7  |
| College degree                      | 226 | 21.9 |
| Bachelor's degree or above          | 757 | 73.2 |
| Missing value                       | 13  | 1.3  |
| Marital status                      |     |      |
| Unmarried                           | 496 | 48.0 |
| Married                             | 507 | 49.0 |
| Divorced or loss of spouse          | 13  | 1.3  |
| Missing value                       | 18  | 1.7  |
| Professional categories             |     |      |
| Nurse                               | 355 | 34.3 |
| Nurse practitioner                  | 473 | 45.7 |
| Nurse supervisor                    | 166 | 16.1 |
| Vice director/director of junior    | 29  | 2.8  |
| Missing value                       | 11  | 1.1  |
| Type of work                        |     |      |
| work during the day                 | 296 | 28.6 |
| Day and night conversion            | 726 | 70.2 |
| Missing value                       | 12  | 1.2  |

As revealed in the Table 2, about 65.2% of participants reported that they had encountered the verbal violence within last 12 months, which is the most incidence rate among all kinds of WPV in hospital.

Other incidence rates of WPV from highest to lowest are: made difficulties (53.9%), smear reputation

(38.1%), mobbing behavior (34.5%), intimidation behavior (18.6%), physical violence (14.4%) and sexual harassment (5.8%).

**Table 2. The incidence rate and rank ordering of WPV against nurses within last 12 months (n = 1034)**

| Violence Styles       | N    | %    | Total | Rank |
|-----------------------|------|------|-------|------|
| Verbal Violence       | 667  | 65.2 | 1023  | 1    |
| Made Difficulties     | 557  | 53.9 | 1022  | 2    |
| Smear Reputation      | 38.4 | 38.1 | 1023  | 3    |
| Mobbing Behavior      | 357  | 34.5 | 1022  | 4    |
| Intimidation Behavior | 192  | 18.6 | 1022  | 5    |
| Physical Violence     | 149  | 14.4 | 1023  | 6    |
| Sexual Harassment     | 60   | 5.8  | 1023  | 7    |

As shown in Table 3, 75.4% of participates reported that they had experienced one or more types of WPV during the previous 12 months, which indicated that prevalence of WPV against nurses is 75.4% in China. Further, 17.1% of participates reported that they had suffered one type of violence, 15.3% of participates reported they had encountered two types of violence, 13.8% of participates reported that they had experienced three types of violence, 13% of participates reported that they had suffered one four types of violence, 8.7% of participates reported that they had suffered five types of violence, 5.1% of participates reported that they had suffered six types of violence and 2.5% of participates reported that they had suffered seven types of violence.

**Table 3. Incidence rate of accumulated types of WPV against nurses within last 12 months (n = 1034)**

| Accumulated Violence | N   | %    | Valid Percent | Cumulative Percentages |
|----------------------|-----|------|---------------|------------------------|
| 0                    | 250 | 24.2 | 24.6          | 24.6                   |
| 1 type               | 174 | 16.8 | 17.1          | 41.7                   |
| 2 types              | 156 | 15.1 | 15.3          | 57.0                   |
| 3 types              | 140 | 13.5 | 13.8          | 70.7                   |
| 4 types              | 132 | 12.8 | 13            | 83.7                   |
| 5 types              | 89  | 8.6  | 8.7           | 92.4                   |
| 6 types              | 52  | 5    | 5.1           | 97.5                   |
| 7 types              | 25  | 2.4  | 2.5           | 100                    |

As revealed in the Table 4, about 83.9% of participants reported that they had encountered the compassion from their co-workers within last 12 months, which is the most incidence rate among three kinds of compassion in hospital. Other incidence rates of compassion from highest to lowest are: from their co-workers (83.9%), from their supervisor (66.4%), on the job (64.4%).

**Table 4. The incidence rate and rank ordering of compassion experience nurses within last 12 months (n = 1034)**

| Compassion Styles     | N   | %    | Total | Rank |
|-----------------------|-----|------|-------|------|
| from their co-workers | 868 | 83.9 | 1022  | 1    |
| from their supervisor | 687 | 66.4 | 1021  | 2    |
| on the job            | 666 | 64.4 | 1020  | 3    |

As revealed in Table 5, 92.4% of participants reported that they had experienced one or more types of compassion during the previous 12 months, which indicated that prevalence of compassion toward nurses is 75.4% in China. Further 14.6% of participants reported that they had suffered one type of compassion, 30.3% of participants reported they had encountered two types of compassion, 47.4% of participants reported that they had experienced three types of compassion.

**Table 5. Incidence rate of accumulated types of compassion experience nurses within last 12 months (n = 1034)**

| Accumulated Compassion | N   | %    | Valid Percent | Cumulative Percentages |
|------------------------|-----|------|---------------|------------------------|
| 0                      | 79  | 7.6  | 7.8           | 7.8                    |
| 1 types                | 148 | 14.3 | 14.6          | 22.3                   |
| 2 types                | 308 | 29.8 | 30.3          | 52.6                   |
| 3 types                | 482 | 46.6 | 47.4          | 100                    |

### Correlations between study variables

The means, standard deviations, and Pearson's correlation coefficients of continuous variables were described in Table 6. As results revealed, all variables were significantly correlated with each other, WPV was negatively correlated with compassion ( $r=-0.224$ ,  $P<0.01$ ) sleeping quality ( $r=-0.194$ ,  $P<0.01$ ) and subjective health status ( $r=-0.254$ ,  $P<0.01$ ) and was positively correlated with stress ( $r=0.302$ ,  $P<0.01$ ). Compassion was positively related to sleeping quality ( $r=0.334$ ,  $P<0.01$ ) and subjective health

status( $r=0.346$ ,  $P<0.01$ ), and was negatively related to stress( $r=-0.234$ ,  $P<0.01$ ). Stress was negatively correlated with sleeping quality( $r=-0.463$ ,  $P<0.01$ ) and subjective health status ( $r=-0.463$ ,  $P<0.01$ ). There was a positive correlation between the sleeping quality and subjective health status( $r=0.597$ ,  $P<0.01$ ).

**Table 6. Means (M), standard deviations (SD) and correlations of variables (n = 1034)**

| Variables                | M     | SD    | N    | WPV      | Compassion | Stress   | Sleeping Quality | Subjective Health Status |
|--------------------------|-------|-------|------|----------|------------|----------|------------------|--------------------------|
| WPV                      | 1.1   | 0.77  | 1018 | 1        |            |          |                  |                          |
| Compassion               | 3.06  | 0.767 | 1017 | -0.224** | 1          |          |                  |                          |
| Stress                   | 13.74 | 4.84  | 1008 | 0.302**  | -0.234**   | 1        |                  |                          |
| Sleeping Quality         | 2.38  | 0.793 | 1022 | -0.194** | 0.334**    | -0.463** | 1                |                          |
| Subjective Health Status | 2.58  | 0.708 | 1022 | -0.254** | 0.346**    | -0.463** | 0.597**          | 1                        |

#### Multiple linear Hierarchical regression models

Multiple hierarchical linear regression analysis was used to evaluate the association between the WPV, compassion, psychological stress, sleep quality, and health status of nurses. Analyzing mediation involves three steps<sup>26</sup>. The first step is to establish that the independent variable influences the mediator ( $M2$ ,  $M12$ ). The second step is to demonstrate the independent variable influences the dependent variable ( $M4$ ,  $M8$ ,  $M14$ ,  $M18$ ). The third and last step is to demonstrate the mediator influences the dependent variable ( $M5$ ,  $M9$ ,  $M15$ ,  $M19$ ), with the independent variable being controlled for ( $M6$ ,  $M10$ ,  $M16$ ,  $M20$ ). In this final step, the effect of the independent variable on the dependent variable is significant reduction when the mediator is in the model partly mediation is indicated<sup>27</sup>. Results of mediation analysis showed that psychological stress is a partial mediator in the relationship between violence and sleep quality, between violence and subjective health. As showed in Table 7. Moreover, psychological stress also partially mediated the relationship between compassion and sleep quality, and between compassion and subjective health. As showed in Table 8.

1  
2  
3  
4  
5  
6  
7  
8  
9  
10  
11  
12  
13  
14  
15  
16  
17  
18  
19  
20  
21  
22  
23  
24  
25  
26  
27  
28  
29  
30  
31  
32  
33  
34  
35  
36  
37  
38  
39  
40  
41  
42  
43  
44  
45  
46  
47  
48  
49  
50  
51  
52  
53  
54  
55  
56  
57  
58  
59  
60

For peer review only

1  
2  
3  
4  
5  
6  
7  
8  
9  
10  
11  
12  
13  
14  
15  
16  
17  
18  
19  
20  
21  
22  
23  
24  
25  
26  
27  
28  
29  
30  
31  
32  
33  
34  
35  
36  
37  
38  
39  
40  
41  
42  
43  
44  
45  
46  
47

**Table 7. Multiple hierarchical linear regression models of variables (WPV Psychological stress Sleep quality Subjective health). (n = 1034).**

| Variables                   | Psychological stress |          | Sleep quality |          |          |          | Subjective health |          |          |          |
|-----------------------------|----------------------|----------|---------------|----------|----------|----------|-------------------|----------|----------|----------|
|                             | M1                   | M2       | M3            | M4       | M5       | M6       | M7                | M8       | M9       | M10      |
| <b>Control Variables</b>    |                      |          |               |          |          |          |                   |          |          |          |
| Age                         | 0.013                | -0.022   | -0.028        | -0.005   | -0.021   | -0.015   | -0.067            | -0.037   | -0.058   | -0.046   |
| Gender                      | 0.055                | 0.043    | -0.005        | 0.004    | 0.022    | 0.023    | -0.013            | -0.002   | 0.12     | 0.016    |
| Service Years               | 0.034                | 0.009    | -0.063        | -0.046   | -0.044   | -0.041   | -0.103            | -0.081   | -0.087   | -0.078   |
| Education                   | -0.003               | 0.003    | -0.024        | -0.027   | -0.024   | -0.025   | -0.02             | -0.025   | -0.025   | -0.024   |
| Marital status              | 0.079                | 0.04     | 0.037         | 0.063    | 0.073    | 0.082    | -0.01             | 0.023    | 0.024    | 0.04     |
| Professional categories     | 0.069                | 0.58     | -0.062        | -0.055   | -0.032   | -0.028   | -0.026            | -0.016   | 0.002    | 0.008    |
| <b>Mediating variable</b>   |                      |          |               |          |          |          |                   |          |          |          |
| Psychological stress        |                      |          |               |          | -0.474** | -0.458** |                   |          | -0.463** | -0.425** |
| <b>Independent variable</b> |                      |          |               |          |          |          |                   |          |          |          |
| WPV                         |                      | 0.295**  |               | -0.198** |          | -0.063** |                   | -0.252** |          | -0.127** |
| F                           | 2.493*               | 15.578** | 1.441         | 6.92**   | 42.645** | 38.193** | 1.922             | 11.142** | 40.953** | 38.19**  |
| R <sup>2</sup>              | 0.015*               | 0.099**  | 0.009         | 0.047**  | 0.23**   | 0.229**  | 0.011             | 0.073**  | 0.223**  | 0.236**  |
| ΔR <sup>2</sup>             | 0.015*               | 0.084**  | 0.009         | 0.038**  | 0.221**  | 0.003**  | 0.011             | 0.061**  | 0.211**  | 0.014**  |

\* p<0.05 \*\* p<0.01,

**Table 8. Multiple hierarchical linear regression models of variables (Compassion Psychological stress Sleep quality Subjective health). (n = 1034)**

| Variables                   | Psychological stress |          | Sleep quality |          |          |          | Subjective health |          |          |          |
|-----------------------------|----------------------|----------|---------------|----------|----------|----------|-------------------|----------|----------|----------|
|                             | M11                  | M12      | M13           | M14      | M15      | M16      | M17               | M18      | M19      | M20      |
| <b>Control Variables</b>    |                      |          |               |          |          |          |                   |          |          |          |
| Age                         | 0.009                | -0.007   | -0.025        | -0.002   | -0.021   | -0.021   | -0.061            | -0.037   | -0.058   | -0.04    |
| Gender                      | 0.05                 | 0.061    | 0.002         | -0.013   | 0.022    | 0.026    | -0.008            | -0.024   | 0.012    | 0.001    |
| Service Years               | 0.037                | 0.017    | -0.61         | -0.033   | -0.044   | -0.043   | -0.102            | -0.073   | -0.087   | -0.066   |
| Education                   | 0.002                | 0.018    | -0.023        | -0.047   | -0.024   | -0.022   | -0.025            | -0.5     | -0.025   | -0.043   |
| Marital status              | 0.081                | 0.083    | 0.036         | 0.033    | 0.073    | 0.074    | -0.013            | -0.016   | 0.024    | 0.018    |
| Professional categories     | 0.071                | 0.049    | -0.064        | -0.033   | -0.032   | -0.03    | -0.03             | -0.003   | 0.002    | 0.023    |
| <b>Mediating variable</b>   |                      |          |               |          |          |          |                   |          |          |          |
| Psychological stress        |                      |          |               |          | -0.474** | -0.473** |                   |          | -0.315** | -0.405** |
| <b>Independent variable</b> |                      |          |               |          |          |          |                   |          |          |          |
| Compassion                  |                      | -0.229** |               | 0.326**  |          | 0.229**  |                   | -0.342** |          | 0.249**  |
| <i>F</i>                    | 2.515                | 10.097** | 1.441         | 17.944** | 42.645** | 47.592** | 1.936             | 20.433** | 40.953** | 48.008** |
| <i>R</i> <sup>2</sup>       | 0.015                | 0.066**  | 0.009         | 0.112**  | 0.23**   | 0.278**  | 0.012             | 0.126**  | 0.223**  | 0.279**  |
| $\Delta R^2$                | 0.015                | 0.051**  | 0.009         | 0.104**  | 0.221**  | 0.049**  | 0.012             | 0.114**  | 0.211**  | 0.058**  |

\* $p < 0.05$  \*\* $p < 0.01$ ,



## Discussions

In this survey, comprising approximately 78.2% participants reported they had experienced some forms of WPV. As well, nearly 70% of the reporters suffered not only one forms of violence types. Compared with the United States, WPV is more serious in Chinese nursing workplace<sup>11</sup>. Compared with other professions, nurses have high rates of non-fatal workplace assault injuries<sup>8</sup>. Result suggested that 92.2% of the participants received compassion from their co-worker, supervisors or work itself. Approximately 50% of the participants acquired three forms of compassion. It is showed that compassion care in medical organization was pretty common. In nursing workplace, both WPV and compassion care are in a high rate.

### The influence of WPV on health outcomes

This study is consistent with prior research conclusion. The exposure to WPV has a significant influence on work stress and health outcomes among nurses<sup>28</sup>. This study also presents a new theoretical contribution, that is, the exposure to WPV had direct and indirect effect on the health outcomes of nurses. Moreover, work stress had a partly mediator effect on their relationship. WPV caused high job stress may result in poor sleep quality and negatively affect physical and psychological health. Namely, WPV reduced subjective sleep quality and subjective health status by weakening work stress of nurses. Previous studies shows that 82.33% of nurses doing shift work had poor sleep quality<sup>13</sup>. Nurses who experienced WPV have emotional fluctuations, increase their job worries, and even appeared intermittently wake up at night, so as to increase the sleep disorders<sup>1</sup>. Violent incidents might result in some serious adverse effects on emotion, cognitive processing, increasing nurses' workload on taking care of hospitalized patients, further causing the stress of nurse. Thus, nurses are uneasy to sleep at night, and feel fatigue, weakness in

1  
2  
3 daily life, which should not keep positive state to face their work and life. Sleep deprivation not  
4  
5 only results in nursing errors and accidents, but can also affect nurses' personal health<sup>29</sup>. The WPV  
6  
7 and their influence under a long circle lead to negative effect on both physical and mental health.  
8  
9

### 10 **The influence of compassion on health outcomes**

11  
12  
13 This study found that high level of work compassion was significantly associated with nurses'  
14  
15 health outcomes in nursing workplace. As a report indicated in previous studies<sup>30</sup>, compassion at  
16  
17 work was beneficial to improve subjective sleep quality and subjective health status. It was shown  
18  
19 that nurses who experienced compassion at work reported a higher score on the subjective sleep  
20  
21 quality and subjective health status than those who did not. Result suggested that the compassion  
22  
23 dedicated to promotion of health outcomes. Once the nurse experience the compassion at work  
24  
25 such as daily care, open listening and holding space from the others<sup>31</sup>, it can prompt positive  
26  
27 feelings<sup>32</sup>, conscious emotional experiences operate to stimulate cognitive processing after some  
28  
29 outcomes or behaviors<sup>32</sup>. Jane E. Dutton finds that acts of compassion express could create  
30  
31 renewable resources of trust, quality connections, and positive emotions, and reaffirm shared  
32  
33 values of dignity, mutual respect confirm that small interpersonal actions could have big  
34  
35 system-wide effects<sup>11</sup>. In fact, nurses are tired caused by the nursing features and satisfies with the  
36  
37 expression of love and care from the others, the compassion at work might help nurses balance  
38  
39 inter-role and emotion conflict. Thus, they are more willing to devote to nursing career, to keep a  
40  
41 positive to face the work challenges, to solve nursing problem. Compassion as a form of care in  
42  
43 the workplace, is simple but works well to release pressure and relax of nurses. It is contribute to  
44  
45 nurses' sleep and healthy life, that is to say getting different forms of compassion could help to  
46  
47 achieve a healthy outcomes thought the mediating role of psychology stress. In relation to these  
48  
49  
50  
51  
52  
53  
54  
55  
56  
57  
58  
59  
60

1  
2  
3 last ones, it help nurses remain empathetic and compassionate professionals and improve the  
4  
5 development of nursing, face work pressure, overloads and those are full of challenge for their  
6  
7 daily nursing.  
8  
9

### 10 **Limitation**

11  
12 Although some significant discoveries were displayed by the present study, it still has several  
13  
14 limitations needed to be mentioned. First, a convenience sample was used in this study, which  
15  
16 risked a potential problem of sampling bias. Second, a cross-sectional nature was not helpful to  
17  
18 establish a causal relationship between the WPV, compassion, stress, sleeping quality and  
19  
20 subjective health status. Thus, one important future direction is that longitudinal studies should be  
21  
22 conducted. Third, data were obtained by the self-report of nurses, to some extent, resulted in  
23  
24 response bias from social desirability or negative affect. Nurses might have overestimated or  
25  
26 underestimated the association between study variables. Using the foreign design scales that  
27  
28 ignored a cross-cultural adaptability in this study, it is worth attracting academic attention in the  
29  
30 future.  
31  
32  
33  
34  
35  
36  
37

### 38 **Conclusion**

39  
40 In this survey, a total of 78.2% participants reported they had experienced some forms of exposure  
41  
42 to WPV. 92.2% experienced the compassion from their co-worker or their supervisor or on the  
43  
44 job. The exposure to WPV has a significantly negative influence on the work stress and health  
45  
46 outcomes of nurses. This study also has a new theoretical contribution, that is, the exposure to  
47  
48 WPV had not only direct but indirect effect on health outcomes of nurses. Work stress had a  
49  
50 partly mediator effect on their relationship. Experienced high level of work compassion were  
51  
52 significantly associated with the health outcomes among nursing workplace, as reported in  
53  
54  
55  
56  
57  
58  
59  
60

1  
2  
3 previous studies, compassion care was beneficial to improve the subjective sleep quality and  
4  
5  
6 subjective health status. There is room for improvement to relieve exposure to WPV by  
7  
8  
9 weakening work stress of nurses. A harmonious work environment for nurses need to be  
10  
11 provided, it is urgent to watch the damage to the health outcomes from WPV among nurses.  
12

13 **Acknowledgments:** The authors thanks the participants at Harbin Medical University for their  
14  
15 support, and give their sincere thanks to all participants who had helped collect data and distribute  
16  
17 questionnaires to other subjects.  
18

19  
20 **Funding:** This study was funded by the Innovation Science Research Foundation of Harbin  
21  
22 Medical University (2016RWZX09) to Tao Sun and also was funded by the Natural Science  
23  
24 Foundation of China (71473063) to Fan Lihua. The authors give their sincere thanks to all  
25  
26 participants who had helped collect data and distribute questionnaires to other subjects.  
27  
28

29  
30 **Author Contribution:** Conceived and designed the experiments: LF TS WL SZ. Performed the  
31  
32 experiments: SZ WL JW YS FX. Analyzed the data: TS WL SZ. Contributed  
33  
34 reagents/materials/analysis tools: WL SZ SC. Wrotten the paper: SZ WL TS.  
35  
36

37  
38 Competing Interests

39  
40 **Competing Interests:** The authors have declared that no competing interests exist.  
41

## 42 References

- 43 1. Lin SH, Liao WC, Chen MY, et al. The impact of shift work on nurses' job stress, sleep quality and  
44 self-perceived health status. *Journal of Nursing Management* 2012;22(5):604-12.
- 45 2. Jiao M, Ning N, Li Y, et al. Workplace violence against nurses in Chinese hospitals: a cross-sectional  
46 survey. *Bmj Open* 2015;5(3):e006719.
- 47 3. Kaya S, Bilgin Dİ, Karsavuran S, et al. Violence Against Doctors and Nurses in Hospitals in Turkey.  
48 *Journal of Forensic Nursing* 2016;12(1):26-34.
- 49 4. Zeng JY, An FR, Xiang YT, et al. Frequency and risk factors of workplace violence on psychiatric  
50 nurses and its impact on their quality of life in China. *Psychiatry Research*  
51 2013;210(2):510-14.
- 52 5. Gerberich SG, Church TR, Mcgovern PM, et al. An epidemiological study of the magnitude and  
53 consequences of work related violence: the Minnesota Nurses' Study. *Occupational &*  
54  
55  
56  
57  
58  
59

- 1  
2  
3 *Environmental Medicine* 2004;61(6):495.
- 4 6. Henneman EA, Roche JP, Fisher DL, et al. Error identification and recovery by student nurses using  
5 human patient simulation: Opportunity to improve patient safety. *Applied Nursing Research*  
6 2010;23(1):11-21.
- 7  
8 7. Ying XD, Zhao LY, Wen GM. Status and affected factors of work stress among nurse. *Industrial Health*  
9 & *Occupational Diseases* 2016
- 10 8. Stansfeld SA, Pike C, Mcmanus S, et al. Occupations, work characteristics and common mental  
11 disorder. *Psychological Medicine* 2013;43(5):961.
- 12 9. Chu LC. Mediating positive moods: the impact of experiencing compassion at work. *J Nurs Manag*  
13 2016;24(1):59-69.
- 14 10. Frost PJ. Why Compassion Counts! *Journal of Management Inquiry* 2011;20(4):395-401.
- 15 11. Lilius JM, Worline MC, Maitlis S, et al. The Contours and Consequences of Compassion at Work.  
16 *Journal of Organizational Behavior* 2008;29(2):193-218.
- 17 12. Mannion G. Compassion as the Fundamental Basis of Morality. *Continuum* 2008
- 18 13. nurse S-HLRMH, Professor M-YCRP. The impact of shift work on nurses' job stress, sleep quality and  
19 self-perceived health status. *Journal of Nursing Management* 2014;22(5):604-12.
- 20 21 14. Garrosa E, Moreno-Jiménez B, Liang Y, et al. The relationship between socio-demographic variables,  
22 job stressors, burnout, and hardy personality in nurses: an exploratory study. *International*  
23 *Journal of Nursing Studies* 2008;45(3):418-27.
- 24 25 15. Bang YE, Park B. The Effects of Nursing Work Environment and Job Stress on Health Problems of  
26 Hospital Nurses. 2016:227-37.
- 27 28 16. Gershon RR, Stone PW, Zeltser M, et al. Organizational climate and nurse health outcomes in the  
29 United States: a systematic review. *Industrial Health* 2007;45(5):622-36.
- 30 31 17. Svedberg P, Lichtenstein P, Pedersen NL. Age and Sex Differences in Genetic and Environmental  
32 Factors for Self-Rated Health: A Twin Study. *The Journals of Gerontology: Series B*  
33 2001;56(3):S171-8.
- 34 35 18. Shiu S. The Sleep Quality and Its Related Factors in the Hospital Nurses. 2006
- 36 37 19. Cohen J, Stuenkel D, Nguyen Q. Providing a healthy work environment for nurses: the influence on  
38 retention. *Journal of Nursing Care Quality* 2009;24(4):308.
- 39 40 20. Wen J, Cheng Y, Hu X, et al. Workload, burnout, and medical mistakes among physicians in China: A  
41 cross-sectional study. *Bioscience trends* 2016;10(1):27-33.
- 42 43 21. Zhang Ding, Lu Dan, Shi Yu, et al. Impact of Patients Violence in Public Hospital on Job Burnout of  
44 Nurses. *Chinese Hospital Management* 2016;36(9):69-71.(In Chinese).
- 45 46 22. Kivimäki M, M Virtanen, M Vartia, et al. Workplace bullying and the risk of cardiovascular disease  
47 and depression. *Occupational & Environmental Medicine* 2003;60(10):779-83.
- 48 49 23. Wanous JP, Reichers AE, Hudy MJ. Overall job satisfaction: how good are single-item measures?  
50 *Journal of Applied Psychology* 1997;82(2):247-52.
- 51 52 24. Buysse DJ, Reynolds CF, Monk TH, et al. The Pittsburgh Sleep Quality Index: a new instrument for  
53 psychiatric practice and research. *Psychiatry research* 1989;28(2):193-213.
- 54 55 25. Fein EC, Skinner N. Clarifying the effect of work hours on health through work-life conflict. *Asia*  
56 *Pacific Journal of Human Resources* 2015;53(4):448-70.
- 57 58 26. Lajunen T, Parker D, Stradling SG. Dimensions of driver anger, aggressive and highway code  
59 violations and their mediation by safety orientation in UK drivers. *Transportation Research*  
60 *Part F Traffic Psychology & Behaviour* 1998;1(2):107-21.

- 1  
2  
3 27. Zhao X, Lynch JG, Chen Q. Reconsidering Baron and Kenny: Myths and Truths about Mediation  
4 Analysis. *Journal of Consumer Research* 2010;37(2):197-206.  
5  
6 28. Lin YH, Liu HE. The impact of workplace violence on nurses in South Taiwan. *International Journal*  
7 *of Nursing Studies* 2005;42(7):773.  
8  
9 29. Tuckett THA. Connecting Leisure-Time Physical Activity and Quality of Sleep to Nurse Health: Data  
10 from the e-Cohort Study of Nurses and Midwives. *Journal of Nursing & Care* 2015;4  
11  
12 30. Phillips JL, Davidson PM, Ollerton R, et al. A survey of commitment and compassion among nurses  
13 in residential aged care. *International Journal of Palliative Nursing* 2016;13(6):282-90.  
14  
15 31. Kedem Y, Bagan Y. Burnout and absenteeism among nurses in health care management.  
16 *Internationalacademyofbusinessandconomics* 2005;;5(:1)  
17  
18 32. Baumeister RF, Vohs KD, Dewall CN, et al. How emotion shapes behavior: feedback, anticipation,  
19 and reflection, rather than direct causation. *Personality & Social Psychology Review*  
20 2007;11(2):167-203.  
21  
22  
23  
24  
25  
26  
27  
28  
29  
30  
31  
32  
33  
34  
35  
36  
37  
38  
39  
40  
41  
42  
43  
44  
45  
46  
47  
48  
49  
50  
51  
52  
53  
54  
55  
56  
57  
58  
59  
60

**STROBE 2007 (v4) Statement—Checklist of items that should be included in reports of *cross-sectional studies***

| Section/Topic                | Item # | Recommendation                                                                                                                                                                       | Reported on page #             |
|------------------------------|--------|--------------------------------------------------------------------------------------------------------------------------------------------------------------------------------------|--------------------------------|
| Title and abstract           | 1      | (a) Indicate the study's design with a commonly used term in the title or the abstract                                                                                               | Page 1, line 24-30;            |
|                              |        | (b) Provide in the abstract an informative and balanced summary of what was done and what was found                                                                                  | P.1; line 31; p.2, line 1-14   |
| <b>Introduction</b>          |        |                                                                                                                                                                                      |                                |
| Background/rationale         | 2      | Explain the scientific background and rationale for the investigation being reported                                                                                                 | p.3, line 2-22; p.5, line 1-4  |
| Objectives                   | 3      | State specific objectives, including any prespecified hypotheses                                                                                                                     | P.5, line 5-9;                 |
| <b>Methods</b>               |        |                                                                                                                                                                                      |                                |
| Study design                 | 4      | Present key elements of study design early in the paper                                                                                                                              | P.5, line 8-9                  |
| Setting                      | 5      | Describe the setting, locations, and relevant dates, including periods of recruitment, exposure, follow-up, and data collection                                                      | p.5, line 10-17                |
| Participants                 | 6      | (a) Give the eligibility criteria, and the sources and methods of selection of participants                                                                                          | P.7, line 10-17                |
| Variables                    | 7      | Clearly define all outcomes, exposures, predictors, potential confounders, and effect modifiers. Give diagnostic criteria, if applicable                                             | no                             |
| Data sources/<br>measurement | 8*     | For each variable of interest, give sources of data and details of methods of assessment (measurement). Describe comparability of assessment methods if there is more than one group | p.6, line 7-22; p.7, line 1-11 |
| Bias                         | 9      | Describe any efforts to address potential sources of bias                                                                                                                            | no                             |
| Study size                   | 10     | Explain how the study size was arrived at                                                                                                                                            | no                             |
| Quantitative variables       | 11     | Explain how quantitative variables were handled in the analyses. If applicable, describe which groupings were chosen and why                                                         | P.7, line 12-20                |

|                     |     |                                                                                                                                                                                                              |                                  |
|---------------------|-----|--------------------------------------------------------------------------------------------------------------------------------------------------------------------------------------------------------------|----------------------------------|
| Statistical methods | 12  | (a) Describe all statistical methods, including those used to control for confounding                                                                                                                        | P.7, line 12-20                  |
|                     |     | (b) Describe any methods used to examine subgroups and interactions                                                                                                                                          | no                               |
|                     |     | (c) Explain how missing data were addressed                                                                                                                                                                  | no                               |
|                     |     | (d) If applicable, describe analytical methods taking account of sampling strategy                                                                                                                           | P.7, line 12-20                  |
|                     |     | (e) Describe any sensitivity analyses                                                                                                                                                                        | no                               |
| <b>Results</b>      |     |                                                                                                                                                                                                              |                                  |
| Participants        | 13* | (a) Report numbers of individuals at each stage of study—eg numbers potentially eligible, examined for eligibility, confirmed eligible, included in the study, completing follow-up, and analysed            | P.7, line 1-33                   |
|                     |     | (b) Give reasons for non-participation at each stage                                                                                                                                                         | no                               |
|                     |     | (c) Consider use of a flow diagram                                                                                                                                                                           | No                               |
| Descriptive data    | 14* | (a) Give characteristics of study participants (eg demographic, clinical, social) and information on exposures and potential confounders                                                                     | P.8; p.9;p.10line 1-20           |
|                     |     | (b) Indicate number of participants with missing data for each variable of interest                                                                                                                          | P.8; p.9                         |
| Outcome data        | 15* | Report numbers of outcome events or summary measures                                                                                                                                                         | P.8; p.9; p.10; p.11,            |
| Main results        | 16  | (a) Give unadjusted estimates and, if applicable, confounder-adjusted estimates and their precision (eg, 95% confidence interval). Make clear which confounders were adjusted for and why they were included | p.13; p.14                       |
|                     |     | (b) Report category boundaries when continuous variables were categorized                                                                                                                                    | no                               |
|                     |     | (c) If relevant, consider translating estimates of relative risk into absolute risk for a meaningful time period                                                                                             | no                               |
| Other analyses      | 17  | Report other analyses done—eg analyses of subgroups and interactions, and sensitivity analyses                                                                                                               | no                               |
| <b>Discussion</b>   |     |                                                                                                                                                                                                              |                                  |
| Key results         | 18  | Summarise key results with reference to study objectives                                                                                                                                                     | p.17;15-22<br>p.15;p.16;p.17line |



1  
2  
3  
4  
5  
6  
7  
8  
9  
10  
11  
12  
13  
14  
15  
16  
17  
18  
19  
20  
21  
22  
23  
24  
25  
26  
27  
28  
29  
30  
31  
32  
33  
34  
35  
36  
37  
38  
39  
40  
41  
42  
43  
44  
45  
46  
47

|                          |    |                                                                                                                                                                            |                         |
|--------------------------|----|----------------------------------------------------------------------------------------------------------------------------------------------------------------------------|-------------------------|
|                          |    |                                                                                                                                                                            | 1-3                     |
| Limitations              | 19 | Discuss limitations of the study, taking into account sources of potential bias or imprecision. Discuss both direction and magnitude of any potential bias                 | P.17, Line 4-14;        |
| Interpretation           | 20 | Give a cautious overall interpretation of results considering objectives, limitations, multiplicity of analyses, results from similar studies, and other relevant evidence | p.15; p.16;p.17line 1-3 |
| Generalisability         | 21 | Discuss the generalisability (external validity) of the study results                                                                                                      | no                      |
| <b>Other information</b> |    |                                                                                                                                                                            |                         |
| Funding                  | 22 | Give the source of funding and the role of the funders for the present study and, if applicable, for the original study on which the present article is based              | P.18, line 8-11         |

\*Give information separately for cases and controls in case-control studies and, if applicable, for exposed and unexposed groups in cohort and cross-sectional studies.

**Note:** An Explanation and Elaboration article discusses each checklist item and gives methodological background and published examples of transparent reporting. The STROBE checklist is best used in conjunction with this article (freely available on the Web sites of PLoS Medicine at <http://www.plosmedicine.org/>, Annals of Internal Medicine at <http://www.annals.org/>, and Epidemiology at <http://www.epidem.com/>). Information on the STROBE Initiative is available at [www.strobe-statement.org](http://www.strobe-statement.org).

# BMJ Open

## Impact of workplace violence and compassionate behavior in hospitals on stress, sleep quality, and subjective health status among Chinese nurses : A cross-sectional survey

|                                 |                                                                                                                                                                                                                                                                                                                                                                                                                                                                                                                                                                                                                               |
|---------------------------------|-------------------------------------------------------------------------------------------------------------------------------------------------------------------------------------------------------------------------------------------------------------------------------------------------------------------------------------------------------------------------------------------------------------------------------------------------------------------------------------------------------------------------------------------------------------------------------------------------------------------------------|
| Journal:                        | <i>BMJ Open</i>                                                                                                                                                                                                                                                                                                                                                                                                                                                                                                                                                                                                               |
| Manuscript ID                   | bmjopen-2017-019373.R1                                                                                                                                                                                                                                                                                                                                                                                                                                                                                                                                                                                                        |
| Article Type:                   | Research                                                                                                                                                                                                                                                                                                                                                                                                                                                                                                                                                                                                                      |
| Date Submitted by the Author:   | 19-Jan-2018                                                                                                                                                                                                                                                                                                                                                                                                                                                                                                                                                                                                                   |
| Complete List of Authors:       | Liu, Wenhui; Harbin Medical University School of Public Health<br>Zhang, Shue; The Third Affiliated Hospital of Harbin Medical University<br>Wang, Jinghui; Harbin Medical University School of Public Health<br>Shi, Yu; Harbin Medical University School of Public Health<br>Xie, Fengzhe; Harbin Medical University School of Public Health<br>Cang, Shuang; Medical Examination Center of the 2nd affiliated hospital of Harbin Medical University<br>Sun, Tao; Harbin Medical University School of Public Health,<br>Fan, Lihua; Harbin Medical University, Department of Health Management<br>, School of Public Health |
| <b>Primary Subject Heading</b>: | Health policy                                                                                                                                                                                                                                                                                                                                                                                                                                                                                                                                                                                                                 |
| Secondary Subject Heading:      | Mental health, Nursing                                                                                                                                                                                                                                                                                                                                                                                                                                                                                                                                                                                                        |
| Keywords:                       | Workplace violence, Chinese Nurses, Sleeping Quality, Subjective Health Status, Compassion                                                                                                                                                                                                                                                                                                                                                                                                                                                                                                                                    |
|                                 |                                                                                                                                                                                                                                                                                                                                                                                                                                                                                                                                                                                                                               |

SCHOLARONE™  
Manuscripts

---

1  
2  
3 **Impact of workplace violence and compassionate behavior in hospitals on stress,**  
4 **sleep quality, and subjective health status among Chinese nurses: A**  
5 **cross-sectional survey**  
6  
7

8 Wenhui Liu<sup>†</sup>, Shu-E Zhang<sup>†</sup>, Jinghui Wang, Yu Shi, Fengzhe Xie, Shuang Cang, Tao Sun\* and Lihua Fan\*

9  
10 Wenhui Liu: Department of Health Management, School of Public Health, Harbin Medical University, Harbin  
11 150081, China

12 Shu-E Zhang: Department of Pharmacy, Harbin Medical University Cancer Hospital, Harbin 150081, China

13 Jinghui Wang: Department of Health Management, School of Public Health, Harbin Medical University, Harbin  
14 150081, China

15  
16 Yu Shi: Department of Health Management, School of Public Health, Harbin Medical University, Harbin 150081,  
17 China

18 Fengzhe Xie: Department of Health Management, School of Public Health, Harbin Medical University, Harbin  
19 150081, China

20  
21 Shuang Cang: Department of Medical Examination Center, the Second Affiliated Hospital of Harbin Medical  
22 University, Harbin 150081, China

23  
24 Tao Sun: Department of Health Management, School of Public Health, Harbin Medical University, Harbin  
25 150081, China

26  
27 Lihua Fan: Department of Health Management, School of Public Health, Harbin Medical University, Harbin  
28 150081, China

29 <sup>†</sup>These authors contributed equally to this work.

30  
31 \*Correspondence: Tao Sun, School of Public Health, Harbin Medical University, Baojian Road 157, Harbin, China,  
32 E-mail: [hydsuntao@126.com](mailto:hydsuntao@126.com), Tel: +86-137-6688-2425; Lihua Fan, School of Public Health, Harbin Medical  
33 University, Baojian Road 157, Harbin, China, E-mail: [lihuafan@126.com](mailto:lihuafan@126.com), Tel.: +86-131-3666-1393  
34

35 **KEYWORDS:** Workplace violence; Chinese Nurses; Compassion; Sleeping Quality;  
36  
37 Subjective Health Status

38  
39  
40 word count: 3878  
41  
42  
43  
44  
45  
46  
47  
48  
49  
50  
51  
52  
53  
54  
55  
56  
57  
58  
59  
60

---

## ABSTRACT

**Objectives:** The aim of this study is to describe the current state of workplace violence (WPV) and compassionate behavior towards nurses, and to explain how they affect nurses' stress, sleep quality, and subjective health status.

**Design:** A cross-sectional online survey study.

**Setting:** The survey was conducted across 8 provinces in China.

**Participants:** A total of 1,024 nurses were recruited to complete an online questionnaire survey from February to May 2016 in China.

**Results:** Approximately 75.4% participants had experienced some form of violence. Most of the participants experienced WPV such as verbal violence (65.2%), made difficulties (54.5%), tarnished reputation (37.5%), mob behavior (34.9%), intimidation behavior (18.8%), physical violence (14.6%), and sexual harassment (5.9%). In this study, 92.4% participants experienced compassionate behavior from their co-workers (84.9%), supervisors (67.3%), and from their patients (65.3%). The results show that the exposure to WPV and compassionate behavior significantly affected the psychological stress, sleep quality, and subjective health status of nurses. Moreover, psychological stress played a partially mediating role in the relationship between work-related violence and health outcomes, and in the relationship between work-related compassion and health outcomes.

**Conclusion:** In China, most nurses have experienced different forms of WPV from patients and/or their relatives, as well as experiencing various forms of compassionate behavior from their co-workers, supervisors, and/or patients. This study investigates

---

1  
2  
3 the prevalence of the different types of WPV and compassionate behavior. Several  
4 aspects of harm to nurses from exposure to violence is confirmed. We found that WPV  
5 can damage nurses' health outcomes, while compassionate behaviors were beneficial to  
6 their health outcomes. A harmonious nursing environment should be provided to  
7 minimize threats to nurses' health status.  
8  
9  
10  
11  
12  
13  
14  
15  
16  
17

### 18 **Strengths and limitations of this study**

19  
20 The prevalence of compassionate behavior towards nurses from three sources is  
21 investigated.  
22

23  
24 This is the first study that investigates the relationship between WPV and  
25 compassionate behavior and psychological stress, sleep quality, and self-reported  
26 health status among nurses in China.  
27

28 This study highlights the mediation effect of psychological stress in nursing practice,  
29 and we demonstrate the interaction mechanisms between these variables.  
30

31 The approach of self-reporting by nurses through an online survey may have resulted in  
32 some bias in the responses, and a convenience sample was used in this study, which  
33 risks the potential problem of a sampling bias.  
34  
35  
36

37 Moreover, causation was not established because of the cross-sectional study design.  
38  
39  
40  
41  
42  
43  
44

## 45 **INTRODUCTION**

46  
47 The environment surrounding nurses directly affects the quality of care that patients receive as  
48 well as the threat to patient safety owing to nursing errors.<sup>1</sup> Workplace violence (WPV) has  
49  
50  
51  
52  
53  
54  
55  
56  
57  
58  
59  
60

---

1  
2  
3 rapidly increased in health institutions,<sup>2</sup> with violence from patients and/or their relatives being the  
4  
5  
6 highest risk to nurses given the frequent level of contact with patients and the possibility of facing  
7  
8 direct medical disputes. WPV includes the threatening acts of verbal threats, physical assaults, and  
9  
10 sexual assaults by patients and/or their relatives, or any other individual that poses a risk towards  
11  
12 medical personnel.<sup>3</sup> Any of these acts of violence could have a negative implication on the health  
13  
14 and safety of nurses,<sup>4,5</sup> and may threaten the quality of patient care.<sup>6</sup> WPV exacerbates the  
15  
16 high-pressure work environment, which may result in very serious health problems among nurses.  
17  
18 Likewise, WPV intensifies nurses' work stress that influence their health status.  
19  
20  
21 Owing to the characteristics of their work environment, nursing is associated with high  
22  
23 levels of psychological stress and professional hardship<sup>7,8</sup>, whereas compassionate  
24  
25 behavior at work is associated with frequent positive emotions and heightened levels of  
26  
27 affective commitment.<sup>9</sup> Peter J. Frost identified compassionate behavior as comprising  
28  
29 three interrelated elements: noticing other's suffering, feeling empathy for other's  
30  
31 pain,<sup>10</sup> and responding to the suffering in some way. Compassionate behavior can be  
32  
33 presented by patients, supervisors, and/or co-workers.<sup>11</sup> Previous studies have found  
34  
35 that nurses frequently felt that their supervisors and co-workers were willing to listen  
36  
37 to them and empathize with their negative emotions and their distress. Nurses obtain  
38  
39 the positive mood that arises from the compassionate behavior, which could effectively  
40  
41 increase their job performance and organizational citizenship behavior (OCB). The  
42  
43 effects of compassionate behaviors contribute to an organization's capacity for  
44  
45 cooperation. Medical and nursing literature suggest that compassionate behavior is a  
46  
47 moral.<sup>12</sup> While compassionate behavior is seen as an essential component of patient  
48  
49  
50  
51  
52  
53  
54  
55  
56  
57  
58  
59  
60

---

1  
2  
3 care, we often ignore nurses who are directly related to and concerned with the  
4  
5  
6 recognition and treatment of patient suffering. Compassionate behavior by patients,  
7  
8 supervisors, and/or co-workers may influence the health outcomes of nurses.  
9  
10  
11 The work environment influences nurses' stress levels that affect the practice  
12  
13 worldwide and nurse-patient relationship in general.<sup>13</sup> The frequency and form of  
14  
15 interaction between nurses and patients may lead nurses to experience different forms  
16  
17 of violence as well as different forms of compassionate behavior at work. Nurses are at  
18  
19 increased risk of work stress and often experience gastrointestinal discomfort<sup>14</sup> and  
20  
21 sleep disorders.<sup>1</sup> A Swedish study reported that 80% of nurses had high or very high  
22  
23 levels of stress.<sup>13</sup> The effect of stress was considered since it is an important cause of  
24  
25 deteriorating health outcomes for nurses and of nursing quality.<sup>15</sup> Bang, Young Eun,  
26  
27 Park, and Bohyun found that the nursing work environment was slightly negative, and  
28  
29 showed that the nursing work environment and nurses' stress levels were factors  
30  
31 affecting their health status.<sup>16</sup> Nurses may neglect their job requirements and make  
32  
33 inadvertent medical errors when psychological stress is accumulated for long periods.<sup>1</sup>  
34  
35 Psychological stress of nurses not only damages their health, but also lead to a negative  
36  
37 impact on patients' recovery in certain ways.<sup>17</sup>  
38  
39  
40  
41  
42  
43  
44  
45 Sleep quality is a person's assessment of his/her sleep related characteristics and  
46  
47 whether these qualities are satisfactory or not.<sup>13</sup> In addition, self-perceived physical  
48  
49 health status serves as a predictor for a person's psychological health.<sup>13</sup> Subjective  
50  
51 sleep quality and subjective health status constitute a person's overall health evaluation.  
52  
53  
54  
55 Both of these elements affect the nurse-patient relationship, organization development,  
56  
57  
58  
59  
60

1  
2  
3 patient satisfaction, and so on.<sup>18</sup> Nurses affected by WPV with high levels of work  
4 stress tend to report poorer self-perceived health,<sup>19</sup> and are 20% more likely to  
5  
6 experience poor sleep quality than those with low levels of stress.<sup>1</sup> Some nurses who  
7  
8 have experienced WPV may react with fewer negative emotions, such as worry,  
9  
10 anxiety, and/or fear, which may lead to a low level of subjective health status. Others  
11  
12 may experience emotional imbalance, higher levels of anxiety, irritability, insomnia,  
13  
14 and depression, which may influence their sleep quality, and simultaneously deteriorate  
15  
16 their health status. On the other hand, compassionate behavior is associated with a  
17  
18 variety of positive emotions which relieve nurses' work pressure,<sup>9</sup> and helps in  
19  
20 maintaining a pleasant working environment, which has a far-reaching influence on  
21  
22 nurses<sup>20</sup> by affecting their health status.<sup>17</sup> WPV and a compassionate work environment  
23  
24 incite different emotional experiences among nurses, which cause different subjective  
25  
26 health assessments.  
27  
28  
29  
30  
31  
32  
33  
34

35 In this study, we attempt to investigate the status of WPV and compassionate behaviors  
36  
37 in hospitals. We conducted a cross-sectional study to investigate the frequency of WPV  
38  
39 to probe into the relationship of these variables, analyze the mechanism of how WPV  
40  
41 and compassionate behaviors affect health outcomes of hospital nurses in China, as  
42  
43 well as whether stress mediates the relationship between WPV and compassionate  
44  
45 behavior at work and their health outcomes. We propose the following hypotheses:  
46  
47  
48 WPV will be negatively correlated to sleep quality and subjective health status.  
49  
50  
51 Psychological stress will mediate the relationship between WPV and sleep quality and  
52  
53 subjective health status. On the contrary, compassionate behavior will be positively  
54  
55  
56  
57  
58  
59  
60



---

1  
2  
3 correlated to sleep quality and subjective health status. Psychological stress will  
4  
5  
6 mediate the relationship between compassionate behavior and sleep quality and  
7  
8 subjective health status.  
9

## 10 **METHODS**

### 11 **Subjects and procedures**

12  
13  
14  
15 This study is based on a cross-sectional descriptive study, which was conducted from  
16  
17 February to May 2016 across eight provinces in China. An anonymous online  
18  
19 questionnaire was completed by nurses in eight provinces. Snowball sampling was  
20  
21 used to collect data. First, we randomly selected 60 nurses who were fully informed of  
22  
23 the content of this survey from four affiliated hospitals of Harbin Medical University.  
24  
25 These 60 nurses were called the “original deliverers.” We sent a web page link to our  
26  
27 questionnaire survey (<https://www.wenjuan.com/>) to their mobile phones. The social  
28  
29 media app WeChat developed by Tencent was used as a tool for the transmission and  
30  
31 reading. Second, colleagues or nursing classmates of the “original deliverers” were  
32  
33 invited to participate in our online survey after they themselves completed the  
34  
35 questionnaire. We encouraged the transfer of questionnaires among nurses.  
36  
37 Subsequently, the number of samples increased with the expansion of the network  
38  
39 relationship of nurses. The questionnaires were self-administered. When a potential  
40  
41 participant received an invitation, they were able to choose to participate or to reject.  
42  
43 Once a nurse chose to participate, the website for the online survey recorded their  
44  
45 information. Hence, we were able to keep track of how many people were invited to  
46  
47 participate. A total of 1,362 nurses were invited to participate in the survey, and  
48  
49  
50  
51  
52  
53  
54  
55  
56  
57  
58  
59  
60

---

ultimately 1,024 valid questionnaires were used in the final data analysis. The effective response rate was 75.18%.

### **Ethics**

The research described in the present article meets the ethical guidelines of the ethics committee of the College of Public Health, Harbin Medical University, and the project has been approved by the Ethics Committee of the Harbin Medical University (ECHMU). A written informed consent could not be received because of the anonymous survey approach. Hence, oral informed consent for the survey was approved by the ECHMU and obtained from each nurse. Once a questionnaire was completed, we assume that the nurses has orally agreed to participate in our survey with reference to Wen's criteria.<sup>21</sup>

### **Measures**

Demographic variables: gender, age, work experience, marital status, professional position, education level, and work shift.

### **Measurement of the WPV ( $\alpha = 0.85$ )**

To assess exposure to WPV caused by patients and/or their relatives, a seven-items measure was used.<sup>22</sup> Nurses were asked the following question, "During the past year, have you found yourself in any of the following situations by a patient and/or their relatives?" Responses were scored on a six-point scale from 0 (never) to 6 (everyday).

Response items included verbal violence (abuse language, sarcasm, indignity, effrontery, shouting, etc.), difficult situations (nitpicky demands, unreasonable requests, non-compliance, heckling, etc.), tarnished reputation (baseless charges or

---

complaints, slander, accusations that damaged reputation, etc.), mob behavior (destruction of public facilities, booing, gathering together to stir up trouble, public disorder, malicious photo taking, etc.), intimidation behavior (oral or written threats, glower, waving clenched fists, threats with weapons, stalking, etc.), physical violence (biting, pushing, fighting, cutting, throwing things towards body, etc.), and sexual harassment (including rape or attempted rape). According to the coding criteria, “never” and “rarely” were coded as not having experienced WPV from patients and/or their relatives, thus, these responses were assigned a score of “0.” Other situations were assigned a “1,” to indicate that the nurses have experienced that sort of violence.

#### **Measurement of compassionate behavior ( $\alpha = 0.69$ )**

Three items developed by J. M. Lilius Respondents<sup>11</sup> were asked to measure compassionate behavior that they experienced at work using a five-point Likert scale (1 (never) to 5 (very frequently)) from their (a) patients, (b) supervisor, and/or (c) co-workers. High scores indicate high levels of compassionate behavior. Considering the suggestion of the original author and because we aim to understand the behaviors that respondents experienced as compassionate, and because we do not want to restrict the respondents’ thinking to only certain kinds of behavior, we chose not to define compassionate behavior for nurses in our survey. Composite index variables were calculated for all scales by averaging across items.

#### **Measurement of psychological stress, sleep quality, and subjective health**

A single item was adopted to measure the psychological stress of nurses,<sup>23</sup> which was “current work ability compared to your lifetime best” (a possible score of 0 (not at all)

1  
2  
3  
4 to 5 (very much)). High scores reflect high levels of psychological stress. Past literature  
5  
6 has confirmed that an item questionnaire has high validity and sensitivity, and that it  
7  
8 can also measure the level of occupational expectations of new nurses.<sup>24</sup> Two single  
9  
10 items were addressed together to measure nurses self-reported health outcomes.  
11  
12 Subjective sleep quality<sup>25</sup> was measured by the question “How would you evaluate  
13  
14 your most recent night’s sleep?” The response ranged from very bad (1) to very good  
15  
16 (4). We consulted the study by Fein and Skinne<sup>26</sup> where the overall subjective health  
17  
18 was estimated by a widely used single-item measure (“In general, how would you rate  
19  
20 your health?” 4 = excellent, 3 = very good, 2 = good, 1 = fair or poor). High scores  
21  
22 reflect high levels of health status.  
23  
24  
25  
26

### 27 28 **Statistical analysis**

29  
30 We used the SPSS statistical software for Windows version 17.0 (SPSS, Inc., Chicago,  
31  
32 IL) for our analysis. Demographic characteristics of the nurses were collected to report  
33  
34 sample information. Pearson’s correlation coefficients were calculated to estimate the  
35  
36 correlation between the exposure to WPV and compassionate behavior, psychological  
37  
38 stress, sleep quality, and self-subjective health status. A series of hierarchical linear  
39  
40 regression analyses were performed to examine our hypotheses according to a  
41  
42 procedure that was suggested by Baron and Kenny. Analyzing mediation involved  
43  
44 three steps.<sup>27</sup> The first step is to establish that the independent variable influences the  
45  
46 mediator (*M2* and *M12*). The second step is to demonstrate that the independent  
47  
48 variable influences the dependent variables (*M4*, *M8*, *M14*, and *M18*). The third and last  
49  
50 step is to demonstrate that the mediator influences the dependent variables (*M5*, *M9*,  
51  
52  
53  
54  
55  
56  
57  
58  
59  
60

*M15*, and *M19*) when the independent variable is controlled (*M6*, *M10*, *M16*, and *M20*).

In this final step, the effect of the independent variable on the dependent variables is significantly reduced when the mediator is in the model partially mediation is indicated<sup>28</sup>.

We provide values including  $F$ ,  $R^2$  and  $R^2$ -changes, and the fit of the model was assessed with  $R^2$ . Standardized regression coefficients ( $\beta$ ) and  $P$  values were calculated for each step in the regression model. Statistical significance was defined as  $P < 0.05$  (two-tailed).

## RESULTS

### Demographic information of the sample

A summary of demographic variables can be seen in Table 1.

**Table 1 Characteristics of the Respondents (n = 1024)**

| Characteristic                      | N   | %    |
|-------------------------------------|-----|------|
| Age                                 |     |      |
| 20-30                               | 709 | 69.2 |
| 31-40                               | 253 | 24.7 |
| 41-50                               | 49  | 4.8  |
| 51+                                 | 4   | 0.4  |
| Missing value                       | 9   | 0.9  |
| Gender                              |     |      |
| Male                                | 87  | 8.5  |
| Female                              | 936 | 91.4 |
| Missing value                       | 1   | 0.1  |
| Education                           |     |      |
| Technical secondary school or below | 38  | 3.7  |
| College degree                      | 226 | 22.1 |
| Bachelor's degree or above          | 757 | 73.9 |
| Missing value                       | 3   | 0.3  |
| Marital status                      |     |      |
| Unmarried                           | 496 | 48.4 |
| Married                             | 507 | 49.5 |
| Divorced or loss of spouse          | 13  | 1.3  |
| Missing value                       | 8   | 0.8  |

|                                  |     |      |  |
|----------------------------------|-----|------|--|
| Professional categories          |     |      |  |
| Nurse                            | 355 | 34.7 |  |
| Nurse practitioner               | 473 | 46.2 |  |
| Nurse supervisor                 | 166 | 16.2 |  |
| Vice director/director of junior | 29  | 2.8  |  |
| Missing value                    | 1   | 0.1  |  |
| Type of work                     |     |      |  |
| work during the day              | 296 | 28.9 |  |
| night shifts                     | 726 | 71.0 |  |
| Missing value                    | 1   | 0.1  |  |

A summary of demographic variables can be seen in Table 1. As shown in Table 2, about 65.2% of participants reported that they had encountered verbal violence within the last 12 months, which is the most common type of WPV in hospitals. Other incidence rates of WPV from highest to lowest are: difficult situations (54.5%), tarnished reputation (37.5%), mob behavior (34.9%), intimidation behavior (18.8%), physical violence (14.6%), and sexual harassment (5.9%).

**Table 2. The incidence rate and rank ordering of WPV against nurses within last 12 months (n = 1024)**

| Violence Styles       | N   | %    | Total | Rank |
|-----------------------|-----|------|-------|------|
| Verbal Violence       | 667 | 65.2 | 1023  | 1    |
| Made Difficulties     | 557 | 54.5 | 1022  | 2    |
| Smear Reputation      | 384 | 37.5 | 1023  | 3    |
| Mobbing Behavior      | 357 | 34.9 | 1022  | 4    |
| Intimidation Behavior | 192 | 18.8 | 1022  | 5    |
| Physical Violence     | 149 | 14.6 | 1023  | 6    |
| Sexual Harassment     | 60  | 5.9  | 1023  | 7    |

We aggregated the experience of the various types of WPV to ascertain the total number of incidents that occurred within the previous 12 months. As shown in Table 3, 75.4% of participants reported that they had experienced one or more types of WPV during the previous 12 months. Furthermore, 17.1%, 15.3%, 13.8%, 13%, 8.7%, 5.1%, 2.5% of participants reported that they had suffered one to seven types of violence, respectively.

**Table 3. Incidence rate of accumulated types of WPV against nurses within last 12 months (n = 1024)**

| Accumulated Violence | N   | %    | Valid Percent | Cumulative Percentages |
|----------------------|-----|------|---------------|------------------------|
| 0                    | 250 | 24.4 | 24.6          | 24.6                   |
| 1 type               | 174 | 16.8 | 17.1          | 41.7                   |
| 2 types              | 156 | 15.1 | 15.3          | 57.0                   |
| 3 types              | 140 | 13.5 | 13.8          | 70.7                   |
| 4 types              | 132 | 12.8 | 13            | 83.7                   |
| 5 types              | 89  | 8.6  | 8.7           | 92.4                   |
| 6 types              | 52  | 5    | 5.1           | 97.5                   |
| 7 types              | 25  | 2.4  | 2.5           | 100                    |

According to the coding criteria, the response “never” was coded as not having experienced compassionate behavior from their co-workers, supervisor and/or patients, thus, these responses were assigned a score of “0.” Other situations were assigned a “1” indicating that nurses had received compassionate behavior. As shown in Table 4, about 84.9% of participants reported that they had encountered compassionate behavior from their co-workers within the last 12 months, which was the highest incidence rate by source of compassionate behavior. The other incidence rates of compassionate behavior from highest to lowest are: from their co-workers (84.9%), from their supervisor (67.3%) and from their patients (65.3%).

**Table 4. The incidence rate and rank ordering of compassion experience nurses within last 12 months (n = 1024)**

| Compassion Styles     | N   | %    | Total | Rank |
|-----------------------|-----|------|-------|------|
| from their co-workers | 868 | 84.9 | 1022  | 1    |
| from their supervisor | 687 | 67.3 | 1021  | 2    |
| from their customer   | 666 | 65.3 | 1020  | 3    |

As shown in Table 5, 92.4% of participants reported that they had experienced one or more types of compassionate behavior during the previous 12 months, which indicated that the prevalence of compassion toward nurses is 92.4%. Furthermore, 14.6% of

participants reported that they had experienced compassionate behavior from one source, 30.3% from two sources, and 47.4% from all three sources.

**Table 5. Incidence rate of accumulated types of compassion experience nurses within last 12 months (n = 1024)**

| Accumulated Compassion | N   | %    | Valid Percent | Cumulative Percentages |
|------------------------|-----|------|---------------|------------------------|
| 0                      | 79  | 7.6  | 7.8           | 7.8                    |
| 1 types                | 148 | 14.3 | 14.6          | 22.3                   |
| 2 types                | 308 | 29.8 | 30.3          | 52.6                   |
| 3 types                | 482 | 46.6 | 47.4          | 100                    |

### Correlation between the variables

The mean, standard deviation, and Pearson's correlation coefficients of the continuous variables are presented in Table 6. All variables are significantly correlated to each other, WPV is negatively correlated to compassionate behavior ( $r = -0.224$ ,  $P < 0.01$ ), sleep quality ( $r = -0.194$ ,  $P < 0.01$ ), and subjective health status ( $r = -0.254$ ,  $P < 0.01$ ), and was positively correlated with stress ( $r = 0.302$ ,  $P < 0.01$ ). Compassionate behavior was positively correlated to sleep quality ( $r = 0.334$ ,  $P < 0.01$ ) and subjective health status ( $r = 0.346$ ,  $P < 0.01$ ), and was negatively correlated to stress ( $r = -0.234$ ,  $P < 0.01$ ). Stress was negatively correlated with sleep quality ( $r = -0.463$ ,  $P < 0.01$ ) and subjective health status ( $r = -0.463$ ,  $P < 0.01$ ). There was a positive correlation between sleep quality and subjective health status ( $r = 0.597$ ,  $P < 0.01$ ).

**Table 6. Means (M), standard deviations (SD) and correlations of variables (n = 1024)**

| Variables   | M     | SD    | N    | Night Shift | WPV      | Compassion | Stress   | Sleeping Quality | Subjective Health Status |
|-------------|-------|-------|------|-------------|----------|------------|----------|------------------|--------------------------|
| Night Shift | 1.71  | 0.45  | 1023 | 1           |          |            |          |                  |                          |
| WPV         | 1.1   | 0.77  | 1018 | -0.025      | 1        |            |          |                  |                          |
| Compassion  | 3.06  | 0.767 | 1017 | -0.021      | -0.224** | 1          |          |                  |                          |
| Stress      | 13.74 | 4.84  | 1008 | -0.009      | 0.302**  | -0.234**   | 1        |                  |                          |
| Sleeping    | 2.38  | 0.793 | 1022 | 0.053       | -0.194** | 0.334**    | -0.463** | 1                |                          |



---

|               |      |       |      |       |          |         |          |         |   |
|---------------|------|-------|------|-------|----------|---------|----------|---------|---|
| Quality       |      |       |      |       |          |         |          |         |   |
| Subjective    | 2.58 | 0.708 | 1022 | 0.032 | -0.254** | 0.346** | -0.463** | 0.597** | 1 |
| Health Status |      |       |      |       |          |         |          |         |   |

---

### Multiple linear hierarchical regression models

The results of the mediation analysis showed that psychological stress is a partial mediator in the relationship between violence and sleep quality, and between violence and subjective health as shown in Table 7. Moreover, psychological stress also partially mediated the relationship between compassionate behavior and sleep quality, and between compassionate behavior and subjective health as shown in Table 8.

**Table 7. Multiple hierarchical linear regression models of variables (WPV, Psychological stress, Sleep quality, Subjective health). (n = 1024).**

| Variables                   | Psychological stress |          |        | Sleep quality |          |          | Subjective health |          |          |          |
|-----------------------------|----------------------|----------|--------|---------------|----------|----------|-------------------|----------|----------|----------|
|                             | M1                   | M2       | M3     | M4            | M5       | M6       | M7                | M8       | M9       | M10      |
| <b>Control Variables</b>    |                      |          |        |               |          |          |                   |          |          |          |
| Age                         | 0.013                | -0.022   | -0.028 | -0.005        | -0.021   | -0.015   | -0.067            | -0.037   | -0.058   | -0.046   |
| Gender                      | 0.055                | 0.043    | -0.005 | 0.004         | 0.022    | 0.023    | -0.013            | -0.002   | 0.12     | 0.016    |
| Service Years               | 0.034                | 0.009    | -0.063 | -0.046        | -0.044   | -0.041   | -0.103            | -0.081   | -0.087   | -0.078   |
| Education                   | -0.003               | 0.003    | -0.024 | -0.027        | -0.024   | -0.025   | -0.02             | -0.025   | -0.025   | -0.024   |
| Marital status              | 0.079                | 0.04     | 0.037  | 0.063         | 0.073    | 0.082    | -0.01             | 0.023    | 0.024    | 0.04     |
| Professional categories     | 0.069                | 0.58     | -0.062 | -0.055        | -0.032   | -0.028   | -0.026            | -0.016   | 0.002    | 0.008    |
| <b>Mediating variable</b>   |                      |          |        |               |          |          |                   |          |          |          |
| Psychological stress        |                      |          |        |               | -0.474** | -0.458** |                   |          | -0.463** | -0.425** |
| <b>Independent variable</b> |                      |          |        |               |          |          |                   |          |          |          |
| WPV                         |                      | 0.295**  |        | -0.198**      |          | -0.063** |                   | -0.252** |          | -0.127** |
| <i>F</i>                    | 2.493*               | 15.578** | 1.441  | 6.92**        | 42.645** | 38.193** | 1.922             | 11.142** | 40.953** | 38.19**  |
| <i>R</i> <sup>2</sup>       | 0.015*               | 0.099**  | 0.009  | 0.047**       | 0.23**   | 0.229**  | 0.011             | 0.073**  | 0.223**  | 0.236**  |
| $\Delta R^2$                | 0.015*               | 0.084**  | 0.009  | 0.038**       | 0.221**  | 0.003**  | 0.011             | 0.061**  | 0.211**  | 0.014**  |

\* $p < 0.05$  \*\* $p < 0.01$ ,

**Table 8. Multiple hierarchical linear regression models of variables (Compassion, Psychological stress, Sleep quality, Subjective health). (n = 1024)**

| Variables                   | Psychological stress |          | Sleep quality |          |          |          | Subjective health |          |          |          |
|-----------------------------|----------------------|----------|---------------|----------|----------|----------|-------------------|----------|----------|----------|
|                             | M11                  | M12      | M13           | M14      | M15      | M16      | M17               | M18      | M19      | M20      |
| <b>Control Variables</b>    |                      |          |               |          |          |          |                   |          |          |          |
| Age                         | 0.009                | -0.007   | -0.025        | -0.002   | -0.021   | -0.021   | -0.061            | -0.037   | -0.058   | -0.04    |
| Gender                      | 0.05                 | 0.061    | 0.002         | -0.013   | 0.022    | 0.026    | -0.008            | -0.024   | 0.012    | 0.001    |
| Service Years               | 0.037                | 0.017    | -0.61         | -0.033   | -0.044   | -0.043   | -0.102            | -0.073   | -0.087   | -0.066   |
| Education                   | 0.002                | 0.018    | -0.023        | -0.047   | -0.024   | -0.022   | -0.025            | -0.5     | -0.025   | -0.043   |
| Marital status              | 0.081                | 0.083    | 0.036         | 0.033    | 0.073    | 0.074    | -0.013            | -0.016   | 0.024    | 0.018    |
| Professional categories     | 0.071                | 0.049    | -0.064        | -0.033   | -0.032   | -0.03    | -0.03             | -0.003   | 0.002    | 0.023    |
| <b>Mediating variable</b>   |                      |          |               |          |          |          |                   |          |          |          |
| Psychological stress        |                      |          |               |          | -0.474** | -0.473** |                   |          | -0.315** | -0.405** |
| <b>Independent variable</b> |                      |          |               |          |          |          |                   |          |          |          |
| Compassion                  |                      | -0.229** |               | 0.326**  |          | 0.229**  |                   | -0.342** |          | 0.249**  |
| <i>F</i>                    | 2.515                | 10.097** | 1.441         | 17.944** | 42.645** | 47.592** | 1.936             | 20.433** | 40.953** | 48.008** |
| <i>R</i> <sup>2</sup>       | 0.015                | 0.066**  | 0.009         | 0.112**  | 0.23**   | 0.278**  | 0.012             | 0.126**  | 0.223**  | 0.279**  |
| $\Delta R^2$                | 0.015                | 0.051**  | 0.009         | 0.104**  | 0.221**  | 0.049**  | 0.012             | 0.114**  | 0.211**  | 0.058**  |

\*  $p < 0.05$  \*\*  $p < 0.01$ ,

---

## DISCUSSION

Approximately 75.4% of survey participants reported they had experienced some form of WPV, and nearly 70% experienced multiple forms of violence types. Compared with the United States, WPV is more serious in Chinese nursing workplaces.<sup>11</sup> Compared with other professions, nurses have higher rates of non-fatal workplace assault injuries.<sup>8</sup> Our results show that 92.4% of participants received compassionate behavior from their co-workers, supervisors and/or work itself. Approximately 50% of the participants received compassionate behavior from all three sources. It is shown that compassionate behavior in medical organizations is common. In the nursing workplace, the incidents of both WPV and compassionate behavior are high.

### **The influence of WPV on health outcomes**

This study is consistent with findings from prior research. The exposure to WPV has a significant influence on work stress and health outcomes among nurses.<sup>29</sup> This study also presents a new theoretical contribution, which shows that the exposure to WPV has a direct and indirect effect on the health outcomes of nurses. Moreover, work stress has a partially mediating effect on their relationship. High job stress caused by WPV may result in poor sleep quality and negatively affect physical and psychological health. Namely, WPV reduced subjective sleep quality and subjective health status by elevating the work stress of nurses. Previous studies showed that 82.33% of nurses performing shift work experienced poor sleep quality.<sup>13</sup> Nurses who experienced WPV have emotional fluctuations, increased anxiety about their jobs, and even reported waking up

---

1  
2  
3 intermittently at night, which decreased their sleep quality.<sup>1</sup> Violent incidents might  
4  
5  
6 result in some serious adverse effects on emotions, cognitive processing, increasing  
7  
8 nurses' workload on taking care of hospitalized patients, which further elevates stress  
9  
10 among nurses, reducing sleep quality, increasing fatigue and weakness in their daily  
11  
12 lives, thereby reducing the overall quality of their work and life. Sleep deprivation not  
13  
14 only results in nursing errors and accidents, but can also affect nurses' personal  
15  
16 health.<sup>30</sup> WPV and their influence lead to negative effect on both physical and mental  
17  
18 health for nurses under a long circle.  
19  
20  
21  
22

### 23 **The influence of compassionate behavior on health outcomes**

24  
25 This study found that high levels of compassionate behavior at work was significantly  
26  
27 associated with nurses' health outcomes. As indicated in previous studies,<sup>31</sup>  
28  
29 compassionate behavior at work was beneficial in improving subjective sleep quality  
30  
31 and subjective health status. It was shown that nurses who experienced compassionate  
32  
33 behavior at work reported a higher score on their subjective sleep quality and subjective  
34  
35 health status than those who did not. Result suggested that the compassionate behaviors  
36  
37 contributed to the promotion of positive health outcomes. Compassionate behavior at  
38  
39 work such as daily interactions, careful listening, and respecting privacy<sup>32</sup> prompted  
40  
41 nurses to hold positive feelings<sup>33</sup> and conscious emotional experiences that stimulate  
42  
43 cognitive processing after certain outcomes or behaviors.<sup>33</sup> Jane E. Dutton found that  
44  
45 acts of compassion created renewable resources of trust, quality connections, positive  
46  
47 emotions, reaffirm shared values of dignity, and mutual respect. She confirmed that  
48  
49 small interpersonal actions could have large system-wide effects.<sup>11</sup> In fact, nurses,  
50  
51  
52  
53  
54  
55  
56  
57  
58  
59  
60

1  
2  
3  
4 tiring from their work , can be satisfied with expressions of love and care from others,  
5  
6 and thus, compassionate behavior at work may help nurses balance their emotion  
7  
8 conflicts. Thus, they are more willing to devote themselves to their career, maintain a  
9  
10 positive attitude in facing work challenges, and actively solve work problems.

11  
12  
13 Compassion as a form of care in the workplace is simple but works well to release  
14  
15 pressure and anxiety among nurses. It contributes to nurses' sleep quality and health  
16  
17 status (i.e., receiving different forms of compassionate behavior can help to achieve  
18  
19 healthy outcomes through the mediating role of psychological stress). Compassionate  
20  
21 behavior helps nurses remain empathetic and compassionate professionals and improve  
22  
23 the development of nursing, face work pressure, work overloads and challenges in their  
24  
25 daily nursing tasks.  
26  
27  
28  
29

### 30 **Limitations**

31  
32 Although some significant discoveries were presented in this study, there are several  
33  
34 limitations that must be mentioned. First, a convenience sample was used in this  
35  
36 study, which risks a potential problem of a sampling bias. Moreover, a total of 1,024  
37  
38 nurses is a small sample when compared to the entire Chinese nurse population. Thus,  
39  
40 the findings cannot be generalized to Chinese nurses in general. Second, a  
41  
42 cross-sectional nature was not helpful in establishing a causal relationship between  
43  
44 WPV, compassionate behavior, stress, sleep quality, and subjective health status.  
45  
46 Thus, an important direction for future research is longitudinal studies. Third, the data  
47  
48 was self-reported by the nurses, and to some extent, may have resulted in a response  
49  
50 bias from social desirability or negative affect. Nurses may have overestimated or  
51  
52  
53  
54  
55  
56  
57  
58  
59  
60

---

1  
2  
3 underestimated the association between study variables. We used foreign design  
4  
5 scales that ignored cross-cultural adaptability in this study, thus, this area is worth  
6  
7 attracting academic attention in the future. Fourth, the method of measurement of  
8  
9 sleep quality is very poor, which we admit is a limitation of the study.  
10  
11

## 12 **CONCLUSION**

13  
14  
15 In this survey, a total of 75.4% participants reported they had experienced some form of  
16  
17 exposure to WPV. About 92.4% experienced compassionate behavior from their  
18  
19 co-workers, supervisor, or patients. Exposure to WPV has a significantly negative  
20  
21 influence on the work stress and health outcomes of nurses. This study also makes a  
22  
23 new theoretical contribution by showing that the exposure to WPV not only has a direct  
24  
25 effect, but also an indirect effect on the health outcomes of nurses. Work stress had a  
26  
27 partially mediating effect on their relationship. High levels of compassionate behavior  
28  
29 at work was significantly associated with health outcomes among nurses, as reported in  
30  
31 previous studies. Compassionate behavior was beneficial in improving subjective sleep  
32  
33 quality and subjective health status. There is room for improvement to relieve exposure  
34  
35 to WPV by lowering the work stress of nurses. A harmonious work environment for  
36  
37 nurses should be provided as the damage to health outcomes due to WPV is clear.  
38

39 **ACKNOWLEDGMENTS:** The authors thanks the participants at Harbin Medical  
40  
41 University for their support, and give their sincere thanks to all participants who had  
42  
43 helped collect data and distribute questionnaires to other subjects.  
44  
45

46  
47 **FUNDINGS:** This study was funded by the Innovation Science Research Foundation  
48  
49 of Harbin Medical University (2016RWZX09) to Tao Sun and also was funded by the  
50  
51 Natural Science Foundation of China (71473063) to Fan Lihua. The authors give their  
52  
53  
54  
55  
56  
57  
58  
59  
60

sincere thanks to all participants who had helped collect data and distribute questionnaires to other subjects.

## FUNDINGS

This study was funded by the Innovation Science Research Foundation of Harbin Medical University (2016RWZX09) to Tao Sun and also was funded by the Natural Science Foundation of China (71473063) to Fan Lihua. The authors give their sincere thanks to all participants who had helped collect data and distribute questionnaires to other subjects.

**AUTHOR CONTRIBUTION:** Conceived and designed the experiments: LF TS WL SZ. Performed the experiments: SZ WL JW YS FX. Analyzed the data: TS WL SZ. Contributed reagents/materials/analysis tools: WL SZ SC. Wroten the paper: SZ WL TS.

**COMPETING INTERESTS:** The authors have declared that no competing interests exist.

**DATA SHARING STATEMENT:** No additional data are available.

## REFERENCES

1. Lin SH, Liao WC, Chen MY, et al. The impact of shift work on nurses' job stress, sleep quality and self-perceived health status. *Journal of Nursing Management* 2012;22(5):604-12.
2. Jiao M, Ning N, Li Y, et al. Workplace violence against nurses in Chinese hospitals: a cross-sectional survey. *Bmj Open* 2015;5(3):e006719.
3. Kaya S, Bilgin Dİ, Karsavuran S, et al. Violence Against Doctors and Nurses in Hospitals in Turkey. *Journal of Forensic Nursing* 2016;12(1):26-34.
4. Zeng JY, An FR, Xiang YT, et al. Frequency and risk factors of workplace violence on psychiatric nurses and its impact on their quality of life in China. *Psychiatry Research* 2013;210(2):510-14.
5. Gerberich SG, Church TR, Mcgovern PM, et al. An epidemiological study of the magnitude and consequences of work related violence: the Minnesota Nurses' Study. *Occupational & Environmental Medicine* 2004;61(6):495.



6. Henneman EA, Roche JP, Fisher DL, et al. Error identification and recovery by student nurses using human patient simulation: Opportunity to improve patient safety. *Applied Nursing Research* 2010;23(1):11-21.
7. Ying XD, Zhao LY, Wen GM. Status and affected factors of work stress among nurse. *Industrial Health & Occupational Diseases* 2016
8. Stansfeld SA, Pike C, Mcmanus S, et al. Occupations, work characteristics and common mental disorder. *Psychological Medicine* 2013;43(5):961.
9. Chu LC. Mediating positive moods: the impact of experiencing compassion at work. *J Nurs Manag* 2016;24(1):59-69.
10. Frost PJ. Why Compassion Counts! *Journal of Management Inquiry* 2011;20(4):395-401.
11. Lilius JM, Worline MC, Maitlis S, et al. The Contours and Consequences of Compassion at Work. *Journal of Organizational Behavior* 2008;29(2):193-218.
12. Mannion G. Compassion as the Fundamental Basis of Morality. *Continuum* 2008
13. nurse S-HLRMH, Professor M-YCRP. The impact of shift work on nurses' job stress, sleep quality and self-perceived health status. *Journal of Nursing Management* 2014;22(5):604-12.
14. Hertig VL, Cain KC, Jarrett ME, et al. Daily stress and gastrointestinal symptoms in women with irritable bowel syndrome. *Nursing Research* 2007;56(6):399.
15. Garrosa E, Moreno-Jiménez B, Liang Y, et al. The relationship between socio-demographic variables, job stressors, burnout, and hardy personality in nurses: an exploratory study. *International Journal of Nursing Studies* 2008;45(3):418-27.
16. Bang YE, Park B. The Effects of Nursing Work Environment and Job Stress on Health Problems of Hospital Nurses. 2016:227-37.
17. Gershon RR, Stone PW, Zeltser M, et al. Organizational climate and nurse health outcomes in the United States: a systematic review. *Industrial Health* 2007;45(5):622-36.
18. Svedberg P, Lichtenstein P, Pedersen NL. Age and Sex Differences in Genetic and Environmental Factors for Self-Rated Health: A Twin Study. *The Journals of Gerontology: Series B* 2001;56(3):S171-8.
19. Shiu S. The Sleep Quality and Its Related Factors in the Hospital Nurses. 2006
20. Cohen J, Stuenkel D, Nguyen Q. Providing a healthy work environment for nurses: the influence on retention. *Journal of Nursing Care Quality* 2009;24(4):308.
21. Wen J, Cheng Y, Hu X, et al. Workload, burnout, and medical mistakes among physicians in China: A cross-sectional study. *Bioscience trends* 2016;10(1):27-33.
22. Zhang Ding, Lu Dan, Shi Yu, et al. Impact of Patients Violence in Public Hospital on Job Burnout of Nurses. *Chinese Hospital Management* 2016;36(9):69-71.(In Chinese).
23. Kivimäki M, M Virtanen, M Vartia, et al. Workplace bullying and the risk of cardiovascular disease and depression. *Occupational & Environmental Medicine* 2003;60(10):779-83.
24. Wanous JP, Reichers AE, Hudy MJ. Overall job satisfaction: how good are single-item measures? *Journal of Applied Psychology* 1997;82(2):247-52.
25. Buysse DJ, Reynolds CF, Monk TH, et al. The Pittsburgh Sleep Quality Index: a new instrument for psychiatric practice and research. *Psychiatry research* 1989;28(2):193-213.
26. Fein EC, Skinner N. Clarifying the effect of work hours on health through work-life conflict. *Asia Pacific Journal of Human Resources* 2015;53(4):448-70.

- 
- 1  
2  
3 27. Lajunen T, Parker D, Stradling SG. Dimensions of driver anger, aggressive and highway code  
4 violations and their mediation by safety orientation in UK drivers. *Transportation*  
5 *Research Part F Traffic Psychology & Behaviour* 1998;1(2):107-21.  
6  
7 28. Zhao X, Lynch JG, Chen Q. Reconsidering Baron and Kenny: Myths and Truths about  
8 Mediation Analysis. *Journal of Consumer Research* 2010;37(2):197-206.  
9  
10 29. Lin YH, Liu HE. The impact of workplace violence on nurses in South Taiwan. *International*  
11 *Journal of Nursing Studies* 2005;42(7):773.  
12  
13 30. Tuckett THA. Connecting Leisure-Time Physical Activity and Quality of Sleep to Nurse Health:  
14 Data from the e-Cohort Study of Nurses and Midwives. *Journal of Nursing & Care* 2015;4  
15  
16 31. Phillips JL, Davidson PM, Ollerton R, et al. A survey of commitment and compassion among  
17 nurses in residential aged care. *International Journal of Palliative Nursing*  
18 2016;13(6):282-90.  
19  
20 32. Kedem Y, Bagan Y. Burnout and absenteeism among nurses in health care management.  
21 *International academy of business and economics* 2005;:5(1)  
22  
23 33. Baumeister RF, Vohs KD, Dewall CN, et al. How emotion shapes behavior: feedback,  
24 anticipation, and reflection, rather than direct causation. *Personality & Social Psychology*  
25 *Review* 2007;11(2):167-203.  
26  
27  
28  
29  
30  
31  
32  
33  
34  
35  
36  
37  
38  
39  
40  
41  
42  
43  
44  
45  
46  
47  
48  
49  
50  
51  
52  
53  
54  
55  
56  
57  
58  
59  
60

**STROBE 2007 (v4) Statement—Checklist of items that should be included in reports of *cross-sectional studies***

| Section/Topic                | Item # | Recommendation                                                                                                                                                                       | Reported on page #             |
|------------------------------|--------|--------------------------------------------------------------------------------------------------------------------------------------------------------------------------------------|--------------------------------|
| <b>Title and abstract</b>    | 1      | (a) Indicate the study's design with a commonly used term in the title or the abstract                                                                                               | Page 1, line 24-30;            |
|                              |        | (b) Provide in the abstract an informative and balanced summary of what was done and what was found                                                                                  | P.1; line 31; p.2, line 1-14   |
| <b>Introduction</b>          |        |                                                                                                                                                                                      |                                |
| Background/rationale         | 2      | Explain the scientific background and rationale for the investigation being reported                                                                                                 | p.3, line 2-22; p.5, line 1-4  |
| Objectives                   | 3      | State specific objectives, including any prespecified hypotheses                                                                                                                     | P.5, line 5-9;                 |
| <b>Methods</b>               |        |                                                                                                                                                                                      |                                |
| Study design                 | 4      | Present key elements of study design early in the paper                                                                                                                              | P.5, line 8-9                  |
| Setting                      | 5      | Describe the setting, locations, and relevant dates, including periods of recruitment, exposure, follow-up, and data collection                                                      | p.5, line 10-17                |
| Participants                 | 6      | (a) Give the eligibility criteria, and the sources and methods of selection of participants                                                                                          | P.7, line 10-17                |
| Variables                    | 7      | Clearly define all outcomes, exposures, predictors, potential confounders, and effect modifiers. Give diagnostic criteria, if applicable                                             | no                             |
| Data sources/<br>measurement | 8*     | For each variable of interest, give sources of data and details of methods of assessment (measurement). Describe comparability of assessment methods if there is more than one group | p.6, line 7-22; p.7, line 1-11 |
| Bias                         | 9      | Describe any efforts to address potential sources of bias                                                                                                                            | no                             |
| Study size                   | 10     | Explain how the study size was arrived at                                                                                                                                            | no                             |
| Quantitative variables       | 11     | Explain how quantitative variables were handled in the analyses. If applicable, describe which groupings were chosen and why                                                         | P.7, line 12-20                |

|                     |     |                                                                                                                                                                                                              |                                  |
|---------------------|-----|--------------------------------------------------------------------------------------------------------------------------------------------------------------------------------------------------------------|----------------------------------|
| Statistical methods | 12  | (a) Describe all statistical methods, including those used to control for confounding                                                                                                                        | P.7, line 12-20                  |
|                     |     | (b) Describe any methods used to examine subgroups and interactions                                                                                                                                          | no                               |
|                     |     | (c) Explain how missing data were addressed                                                                                                                                                                  | no                               |
|                     |     | (d) If applicable, describe analytical methods taking account of sampling strategy                                                                                                                           | P.7, line 12-20                  |
|                     |     | (e) Describe any sensitivity analyses                                                                                                                                                                        | no                               |
| <b>Results</b>      |     |                                                                                                                                                                                                              |                                  |
| Participants        | 13* | (a) Report numbers of individuals at each stage of study—eg numbers potentially eligible, examined for eligibility, confirmed eligible, included in the study, completing follow-up, and analysed            | P.7, line 1-33                   |
|                     |     | (b) Give reasons for non-participation at each stage                                                                                                                                                         | no                               |
|                     |     | (c) Consider use of a flow diagram                                                                                                                                                                           | No                               |
| Descriptive data    | 14* | (a) Give characteristics of study participants (eg demographic, clinical, social) and information on exposures and potential confounders                                                                     | P.8; p.9;p.10line 1-20           |
|                     |     | (b) Indicate number of participants with missing data for each variable of interest                                                                                                                          | P.8; p.9                         |
| Outcome data        | 15* | Report numbers of outcome events or summary measures                                                                                                                                                         | P.8; p.9; p.10; p.11,            |
| Main results        | 16  | (a) Give unadjusted estimates and, if applicable, confounder-adjusted estimates and their precision (eg, 95% confidence interval). Make clear which confounders were adjusted for and why they were included | p.13; p.14                       |
|                     |     | (b) Report category boundaries when continuous variables were categorized                                                                                                                                    | no                               |
|                     |     | (c) If relevant, consider translating estimates of relative risk into absolute risk for a meaningful time period                                                                                             | no                               |
| Other analyses      | 17  | Report other analyses done—eg analyses of subgroups and interactions, and sensitivity analyses                                                                                                               | no                               |
| <b>Discussion</b>   |     |                                                                                                                                                                                                              |                                  |
| Key results         | 18  | Summarise key results with reference to study objectives                                                                                                                                                     | p.17;15-22<br>p.15;p.16;p.17line |

1  
2  
3  
4  
5  
6  
7  
8  
9  
10  
11  
12  
13  
14  
15  
16  
17  
18  
19  
20  
21  
22  
23  
24  
25  
26  
27  
28  
29  
30  
31  
32  
33  
34  
35  
36  
37  
38  
39  
40  
41  
42  
43  
44  
45  
46  
47

|                          |    |                                                                                                                                                                            |                         |
|--------------------------|----|----------------------------------------------------------------------------------------------------------------------------------------------------------------------------|-------------------------|
|                          |    |                                                                                                                                                                            | 1-3                     |
| Limitations              | 19 | Discuss limitations of the study, taking into account sources of potential bias or imprecision. Discuss both direction and magnitude of any potential bias                 | P.17, Line 4-14;        |
| Interpretation           | 20 | Give a cautious overall interpretation of results considering objectives, limitations, multiplicity of analyses, results from similar studies, and other relevant evidence | p.15; p.16;p.17line 1-3 |
| Generalisability         | 21 | Discuss the generalisability (external validity) of the study results                                                                                                      | no                      |
| <b>Other information</b> |    |                                                                                                                                                                            |                         |
| Funding                  | 22 | Give the source of funding and the role of the funders for the present study and, if applicable, for the original study on which the present article is based              | P.18, line 8-11         |

\*Give information separately for cases and controls in case-control studies and, if applicable, for exposed and unexposed groups in cohort and cross-sectional studies.

**Note:** An Explanation and Elaboration article discusses each checklist item and gives methodological background and published examples of transparent reporting. The STROBE checklist is best used in conjunction with this article (freely available on the Web sites of PLoS Medicine at <http://www.plosmedicine.org/>, Annals of Internal Medicine at <http://www.annals.org/>, and Epidemiology at <http://www.epidem.com/>). Information on the STROBE Initiative is available at [www.strobe-statement.org](http://www.strobe-statement.org).

# BMJ Open

## Impact of workplace violence and compassionate behavior in hospitals on stress, sleep quality, and subjective health status among Chinese nurses : A cross-sectional survey

|                                 |                                                                                                                                                                                                                                                                                                                                                                                                                                                                                                                                                                                                                            |
|---------------------------------|----------------------------------------------------------------------------------------------------------------------------------------------------------------------------------------------------------------------------------------------------------------------------------------------------------------------------------------------------------------------------------------------------------------------------------------------------------------------------------------------------------------------------------------------------------------------------------------------------------------------------|
| Journal:                        | <i>BMJ Open</i>                                                                                                                                                                                                                                                                                                                                                                                                                                                                                                                                                                                                            |
| Manuscript ID                   | bmjopen-2017-019373.R2                                                                                                                                                                                                                                                                                                                                                                                                                                                                                                                                                                                                     |
| Article Type:                   | Research                                                                                                                                                                                                                                                                                                                                                                                                                                                                                                                                                                                                                   |
| Date Submitted by the Author:   | 17-Mar-2018                                                                                                                                                                                                                                                                                                                                                                                                                                                                                                                                                                                                                |
| Complete List of Authors:       | Zhang, Shue; The Third Affiliated Hospital of Harbin Medical University<br>Liu, Wenhui; Harbin Medical University School of Public Health<br>Wang, Jinghui; Harbin Medical University School of Public Health<br>Shi, Yu; Harbin Medical University School of Public Health<br>Xie, Fengzhe; Harbin Medical University School of Public Health<br>Cang, Shuang; Medical Examination Center of the 2nd affiliated hospital of Harbin Medical University<br>Sun, Tao; Harbin Medical University School of Public Health,<br>Fan, Lihua; Harbin Medical University, Department of Health Management , School of Public Health |
| <b>Primary Subject Heading</b>: | Health policy                                                                                                                                                                                                                                                                                                                                                                                                                                                                                                                                                                                                              |
| Secondary Subject Heading:      | Mental health, Nursing                                                                                                                                                                                                                                                                                                                                                                                                                                                                                                                                                                                                     |
| Keywords:                       | Workplace violence, Chinese Nurses, Sleeping Quality, Subjective Health Status, Compassion                                                                                                                                                                                                                                                                                                                                                                                                                                                                                                                                 |
|                                 |                                                                                                                                                                                                                                                                                                                                                                                                                                                                                                                                                                                                                            |

SCHOLARONE™  
Manuscripts

1  
2  
3 **Impact of workplace violence and compassionate behavior in hospitals on stress,**  
4 **sleep quality, and subjective health status among Chinese nurses: A**  
5 **cross-sectional survey**  
6  
7

8 Shu-E Zhang<sup>†</sup>, Wenhui Liu<sup>†</sup>, Jinghui Wang, Yu Shi, Fengzhe Xie, Shuang Cang, Tao Sun\* and Lihua Fan\*

9 Shu-E Zhang: Department of Pharmacy, Harbin Medical University Cancer Hospital, Harbin 150040, China

10 Wenhui Liu: Department of Health Management, School of Public Health, Harbin Medical University, Harbin  
11 150081, China

12 Jinghui Wang: Department of Health Management, School of Public Health, Harbin Medical University, Harbin  
13 150081, China

14 Yu Shi: Department of Health Management, School of Public Health, Harbin Medical University, Harbin 150081,  
15 China

16 Fengzhe Xie: Department of Health Management, School of Public Health, Harbin Medical University, Harbin  
17 150081, China

18 Shuang Cang: Department of Medical Examination Center, the Second Affiliated Hospital of Harbin Medical  
19 University, Harbin 150081, China

20 Tao Sun: Department of Health Management, School of Public Health, Harbin Medical University, Harbin  
21 150081, China

22 Lihua Fan: Department of Health Management, School of Public Health, Harbin Medical University, Harbin  
23 150081, China

24  
25  
26  
27  
28  
29 <sup>†</sup>These authors contributed equally to this work.

30 \*Correspondence: Tao Sun, School of Public Health, Harbin Medical University, Baojian Road 157, Harbin, China,  
31 E-mail: hydsuntao@126.com, Tel: +86-137-6688-2425; Lihua Fan, School of Public Health, Harbin Medical  
32 University, Baojian Road 157, Harbin, China, E-mail: lihuafan@126.com, Tel.: +86-131-3666-1393

33  
34  
35 **KEYWORDS:** Workplace violence; Chinese Nurses; Compassion; Sleeping Quality;  
36  
37 Subjective Health Status

38  
39  
40 word count: 3878  
41  
42  
43  
44  
45  
46  
47  
48  
49  
50  
51  
52  
53  
54  
55  
56  
57  
58  
59  
60

## ABSTRACT

**Objectives:** The aim of this study is to describe the current state of workplace violence (WPV) and compassionate behavior towards nurses, and to explain how they affect nurses' stress, sleep quality, and subjective health status.

**Design:** A cross-sectional online survey study.

**Setting:** The survey was conducted across 8 provinces in China.

**Participants:** A total of 1,024 nurses were recruited to complete an online questionnaire survey from February to May 2016 in China.

**Results:** Approximately 75.4% participants had experienced some form of violence. Most of the participants experienced WPV such as verbal violence (65.2%), made difficulties (54.5%), tarnished reputation (37.5%), mob behavior (34.9%), intimidation behavior (18.8%), physical violence (14.6%), and sexual harassment (5.9%). In this study, 92.4% participants experienced compassionate behavior from their co-workers (84.9%), supervisors (67.3%), and from their patients (65.3%). The results show that the exposure to WPV behavior significantly affected the psychological stress ( $\beta = 0.295, P < 0.01$ ), sleep quality ( $\beta = -0.198, P < 0.01$ ), and subjective health status ( $\beta = -0.252, P < 0.01$ ) of nurses. The exposure to compassionate behavior significantly affected the psychological stress ( $\beta = -0.229, P < 0.01$ ), sleep quality ( $\beta = 0.326, P < 0.01$ ), and subjective health status ( $\beta = 0.342, P < 0.01$ ) of nurses. The results of the mediation analysis showed that psychological stress is a partial mediator in the relationship between violence and sleep quality ( $\beta = -0.458, P < 0.01$ ) and between violence and subjective health ( $\beta = -0.425, P < 0.01$ ). Moreover, psychological stress



1  
2  
3 also partially mediated the relationship between compassionate behavior and sleep  
4  
5 quality ( $\beta = -0.473, P < 0.01$ ), and between compassionate behavior and subjective  
6  
7 health ( $\beta = -0.405, P < 0.01$ ).  
8  
9

10 **Conclusion:** In China, most nurses have experienced different forms of WPV from  
11  
12 patients and/or their relatives, as well as experiencing various forms of compassionate  
13  
14 behavior from their co-workers, supervisors, and/or patients. This study investigates  
15  
16 the prevalence of the different types of WPV and compassionate behavior. Several  
17  
18 aspects of harm to nurses from exposure to violence is confirmed. We found that WPV  
19  
20 can damage nurses' health outcomes, while compassionate behaviors were beneficial to  
21  
22 their health outcomes. A harmonious nursing environment should be provided to  
23  
24 minimize threats to nurses' health status.  
25  
26  
27  
28  
29  
30  
31  
32

### 33 **Strengths and limitations of this study**

34  
35 The prevalence of compassionate behavior towards nurses from three sources is  
36  
37 investigated.  
38

39  
40 This is the first study that investigates the relationship between WPV and  
41  
42 compassionate behavior and psychological stress, sleep quality, and self-reported  
43  
44 health status among nurses in China.  
45

46  
47 This study highlights the mediation effect of psychological stress in nursing practice,  
48  
49 and we demonstrate the interaction mechanisms between these variables.  
50  
51  
52  
53  
54  
55  
56  
57  
58  
59  
60

1  
2  
3 The approach of self-reporting by nurses through an online survey may have resulted in  
4  
5 some bias in the responses, and a convenience sample was used in this study, which  
6  
7 risks the potential problem of a sampling bias.  
8  
9

10 Moreover, causation was not established because of the cross-sectional study design.  
11  
12

## 13 14 15 **INTRODUCTION**

16  
17 The environment surrounding nurses directly affects the quality of care that patients  
18  
19 receive as well as the threat to patient safety owing to nursing errors.<sup>1</sup> Workplace  
20  
21 violence (WPV) is an important occupational hazard for nurses.<sup>2</sup> Workplace violence  
22  
23 has rapidly increased in health institutions,<sup>3</sup> with violence from patients and/or their  
24  
25 relatives being the highest risk to nurses given the frequent level of contact with  
26  
27 patients and the possibility of facing direct medical disputes. WPV includes the  
28  
29 threatening acts of verbal threats, physical assaults, and sexual assaults by patients  
30  
31 and/or their relatives, or any other individual that poses a risk towards medical  
32  
33 personnel.<sup>4</sup> Any of these acts of violence could have a negative implication on the  
34  
35 health and safety of nurses,<sup>2 5 6</sup> and may threaten the quality of patient care.<sup>7</sup>  
36  
37  
38  
39  
40  
41  
42  
43  
44  
45  
46  
47  
48  
49  
50  
51  
52  
53  
54  
55  
56  
57  
58  
59  
60  
Zampieron found that nurses were at the highest risk of aggression when they were  
overtired, stressed, and dissatisfied with their work.<sup>8</sup> Magnavita's studies have shown  
that the relationship between violence and stress is mutual: violence causes stress, and  
the stressed nurses is prone to violence observed , confirmed the relationship between  
work-related distress and WPV is bidirectional.<sup>9</sup> WPV exacerbates the high-pressure

1  
2  
3 work environment, which may result in very serious health problems among nurses.  
4  
5 Likewise, WPV intensifies nurses' work stress that influence their health status.<sup>2</sup>  
6  
7  
8 Owing to the characteristics of their work environment, nursing is associated with high  
9  
10 levels of psychological stress and professional hardship,<sup>10 11</sup> whereas compassionate  
11  
12 behavior at work is associated with frequent positive emotions and heightened levels of  
13  
14 affective commitment.<sup>12</sup> Peter J. Frost identified compassionate behavior as comprising  
15  
16 three interrelated elements: noticing other's suffering, feeling empathy for other's  
17  
18 pain,<sup>13</sup> and responding to the suffering in some way. Compassionate behavior can be  
19  
20 presented by patients, supervisors, and/or co-workers.<sup>14</sup> Previous studies have found  
21  
22 that nurses frequently felt that their supervisors and co-workers were willing to listen  
23  
24 to them and empathize with their negative emotions and their distress. Nurses obtain  
25  
26 the positive mood that arises from the compassionate behavior, which could effectively  
27  
28 increase their job performance and organizational citizenship behavior (OCB). The  
29  
30 effects of compassionate behaviors contribute to an organization's capacity for  
31  
32 cooperation. Medical and nursing literature suggest that compassionate behavior is a  
33  
34 moral.<sup>15</sup> While compassionate behavior is seen as an essential component of patient  
35  
36 care, we often ignore nurses who are directly related to and concerned with the  
37  
38 recognition and treatment of patient suffering. Compassionate behavior by patients,  
39  
40 supervisors, and/or co-workers may influence the health outcomes of nurses.  
41  
42  
43 The work environment influences nurses' stress levels that affect the practice  
44  
45 worldwide and nurse-patient relationship in general.<sup>16</sup> The frequency and form of  
46  
47 interaction between nurses and patients may lead nurses to experience different forms  
48  
49  
50  
51  
52  
53  
54  
55  
56  
57  
58  
59  
60

1  
2  
3 of violence as well as different forms of compassionate behavior at work. Nurses are at  
4  
5 increased risk of work stress and often experience gastrointestinal discomfort<sup>17</sup> and  
6  
7 sleep disorders.<sup>16</sup> The relationship between violence and stress has been studied by  
8  
9 many studies<sup>18</sup>, some of which analyze the individual consequences of violence on the  
10  
11 behavior of nurses to patients.<sup>19</sup> The effect of stress was considered since it is an  
12  
13 important cause of deteriorating health outcomes for nurses and of nursing quality.<sup>20</sup>  
14  
15 Bang, Young Eun, Park, and Bohyun found that the nursing work environment was  
16  
17 slightly negative, and showed that the nursing work environment and nurses' stress  
18  
19 levels were factors affecting their health status.<sup>21</sup> Nurses may neglect their job  
20  
21 requirements and make inadvertent medical errors when psychological stress is  
22  
23 accumulated for long periods.<sup>16</sup> Psychological stress of nurses not only damages their  
24  
25 health, but also lead to a negative impact on patients' recovery in certain ways.<sup>22</sup>  
26  
27 Sleep quality is a person's assessment of his/her sleep related characteristics and  
28  
29 whether these qualities are satisfactory or not. Nursing environment may interfere with  
30  
31 sleep, in turn, sleep disturbances can endanger the health and safety of nurses.<sup>23</sup> In  
32  
33 addition, self-perceived physical health status serves as a predictor for a person's  
34  
35 psychological health.<sup>16</sup> Subjective sleep quality and subjective health status constitute a  
36  
37 person's overall health evaluation. Both of these elements affect the nurse-patient  
38  
39 relationship, organization development, patient satisfaction, and so on.<sup>24</sup> Nurses  
40  
41 affected by WPV with high levels of work stress tend to report poorer self-perceived  
42  
43 health,<sup>25</sup> and are 20% more likely to experience poor sleep quality than those with low  
44  
45 levels of stress.<sup>16</sup> Some nurses who have experienced WPV may react with fewer  
46  
47  
48  
49  
50  
51  
52  
53  
54  
55  
56  
57  
58  
59  
60

1  
2  
3 negative emotions, such as worry, anxiety, and/or fear, which may lead to a low level of  
4  
5 subjective health status. Others may experience emotional imbalance, higher levels of  
6  
7 anxiety, irritability, insomnia, and depression, which may influence their sleep quality,  
8  
9 and simultaneously deteriorate their health status. In recent years, the relationships  
10  
11 between violence, sleep and stress it is good to mention pre-existing studies, which  
12  
13 have recently been revised.<sup>23 26</sup> On the other hand, compassionate behavior is  
14  
15 associated with a variety of positive emotions which relieve nurses' work pressure,<sup>12</sup>  
16  
17 and helps in maintaining a pleasant working environment, which has a far-reaching  
18  
19 influence on nurses<sup>27</sup> by affecting their health status.<sup>22</sup> WPV and a compassionate work  
20  
21 environment incite different emotional experiences among nurses, which cause  
22  
23 different subjective health assessments.

24  
25  
26  
27  
28  
29  
30 In this study, we attempt to investigate the status of WPV and compassionate behaviors  
31  
32 in hospitals. We conducted a cross-sectional study to investigate the frequency of WPV  
33  
34 to probe into the relationship of these variables, analyze the mechanism of how WPV  
35  
36 and compassionate behaviors affect health outcomes of hospital nurses in China, as  
37  
38 well as whether stress mediates the relationship between WPV and compassionate  
39  
40 behavior at work and their health outcomes. We propose the following hypotheses:  
41  
42  
43 WPV will be negatively correlated to sleep quality and subjective health status.  
44  
45  
46 Psychological stress will mediate the relationship between WPV and sleep quality and  
47  
48 subjective health status. On the contrary, compassionate behavior will be positively  
49  
50 correlated to sleep quality and subjective health status. Psychological stress will  
51  
52  
53  
54  
55  
56  
57  
58  
59  
60

1  
2  
3 mediate the relationship between compassionate behavior and sleep quality and  
4  
5  
6 subjective health status.  
7

## 8 **METHODS**

### 10 **Subjects and procedures**

11  
12  
13 This study is based on a cross-sectional descriptive study, which was conducted from  
14  
15  
16 February to May 2016 across eight provinces in China. An anonymous online  
17  
18  
19 questionnaire was completed by nurses in eight provinces. Snowball sampling was  
20  
21  
22 used to collect data. First, we randomly selected 60 nurses who were fully informed of  
23  
24  
25 the content of this survey from four affiliated hospitals of Harbin Medical University.  
26  
27  
28 These 60 nurses were called the “original deliverers.” We sent a web page link to our  
29  
30  
31 questionnaire survey (<https://www.wenjuan.com/>) to their mobile phones. The social  
32  
33  
34 media app WeChat developed by Tencent was used as a tool for the transmission and  
35  
36  
37 reading. Second, colleagues or nursing classmates of the “original deliverers” were  
38  
39  
40 invited to participate in our online survey after they themselves completed the  
41  
42  
43 questionnaire. We encouraged the transfer of questionnaires among nurses.  
44  
45  
46 Subsequently, the number of samples increased with the expansion of the network  
47  
48  
49 relationship of nurses. The questionnaires were self-administered. When a potential  
50  
51  
52 participant received an invitation, they were able to choose to participate or to reject.  
53  
54  
55 Once a nurse chose to participate, the website for the online survey recorded their  
56  
57  
58 information. Hence, we were able to keep track of how many people were invited to  
59  
60  
61 participate. A total of 1,362 nurses were invited to participate in the survey, and

1  
2  
3 ultimately 1,024 valid questionnaires were used in the final data analysis. The effective  
4  
5 response rate was 75.18%.  
6  
7

### 8 **Patient and public involvement**

9  
10 Patient and public were not involved.  
11  
12

### 13 **Ethics**

14  
15 The research described in the present article meets the ethical guidelines of the ethics  
16  
17 committee of the College of Public Health, Harbin Medical University, and the project  
18  
19 has been approved by the Ethics Committee of the Harbin Medical University  
20  
21 (ECHMU). A written informed consent could not be received because of the  
22  
23 anonymous survey approach. Hence, oral informed consent for the survey was  
24  
25 approved by the ECHMU and obtained from each nurse. Once a questionnaire was  
26  
27 completed, we assume that the nurses has orally agreed to participate in our survey with  
28  
29 reference to Wen's criteria.<sup>28</sup>  
30  
31  
32  
33  
34

### 35 **Measures**

36  
37 Demographic variables: gender, age, work experience, marital status, professional  
38  
39 position, education level, and work shift.  
40  
41  
42

### 43 **Measurement of the WPV ( $\alpha = 0.85$ )**

44  
45 To assess exposure to WPV caused by patients and/or their relatives, a seven-items  
46  
47 measure was used.<sup>29</sup> Nurses were asked the following question, "During the past year,  
48  
49 have you found yourself in any of the following situations by a patient and/or their  
50  
51 relatives?" Responses were scored on a six-point scale from 0 (never) to 6 (everyday).  
52  
53

54  
55 Response items included verbal violence (abuse language, sarcasm, indignity,  
56  
57  
58  
59  
60

1  
2  
3  
4  
5  
6  
7  
8  
9  
10  
11  
12  
13  
14  
15  
16  
17  
18  
19  
20  
21  
22  
23  
24  
25  
26  
27  
28  
29  
30  
31  
32  
33  
34  
35  
36  
37  
38  
39  
40  
41  
42  
43  
44  
45  
46  
47  
48  
49  
50  
51  
52  
53  
54

effrontery, shouting, etc.), difficult situations (nitpicky demands, unreasonable requests, non-compliance, heckling, etc.), tarnished reputation (baseless charges or complaints, slander, accusations that damaged reputation, etc.), mob behavior (destruction of public facilities, booing, gathering together to stir up trouble, public disorder, malicious photo taking, etc.), intimidation behavior (oral or written threats, glower, waving clenched fists, threats with weapons, stalking, etc.), physical violence (biting, pushing, fighting, cutting, throwing things towards body, etc.), and sexual harassment (including rape or attempted rape). According to the coding criteria, “never” and “rarely” were coded as not having experienced WPV from patients and/or their relatives, thus, these responses were assigned a score of “0”. Other situations were assigned a “1” to indicate that the nurses have experienced that sort of violence.

### 30 31 32 33 34 35 36 37 38 39 40 41 42 43 44 45 46 47 48 49 50 51 52 53 54

**Measurement of compassionate behavior ( $\alpha = 0.69$ )**

35  
36  
37  
38  
39  
40  
41  
42  
43  
44  
45  
46  
47  
48  
49  
50  
51  
52  
53  
54  
55  
56  
57  
58  
59  
60

Three items developed by J. M. Lilius Respondents<sup>14</sup> were asked to measure compassionate behavior that they experienced at work using a five-point Likert scale 1 (never) to 5 (very frequently) from their (a) patients, (b) supervisor, and/or (c) co-workers. High scores indicate high levels of compassionate behavior. Considering the suggestion of the original author and because we aim to understand the behaviors that respondents experienced as compassionate, and because we do not want to restrict the respondents’ thinking to only certain kinds of behavior, we chose not to define compassionate behavior for nurses in our survey. Composite index variables were calculated for all scales by averaging across items.

### 55 56 57 58 59 60

**Measurement of psychological stress, sleep quality, and subjective health**



1  
2  
3 A single item was adopted to measure the psychological stress of nurses,<sup>30</sup> which was  
4  
5  
6 “current work ability compared to your lifetime best” (a possible score of 0 (not at all)  
7  
8 to 5 (very much). High scores reflect high levels of psychological stress. Past literature  
9  
10 has confirmed that an item questionnaire has high validity and sensitivity, and that it  
11  
12 can also measure the level of occupational expectations of new nurses.<sup>31</sup> Two single  
13  
14 items were addressed together to measure nurses self-reported health outcomes.  
15  
16 Subjective sleep quality<sup>32</sup> was measured by the question “How would you evaluate  
17  
18 your most recent night’s sleep?” The response ranged from very bad (1) to very good  
19  
20 (4). We consulted the study by Fein and Skinne<sup>33</sup> where the overall subjective health  
21  
22 was estimated by a widely used single-item measure (“In general, how would you rate  
23  
24 your health?” 4 = excellent, 3 = very good, 2 = good, 1 = fair or poor). High scores  
25  
26 reflect high levels of health status.  
27  
28  
29  
30  
31

### 32 **Statistical analysis**

33  
34 We used the SPSS statistical software for Windows version 17.0 (SPSS, Inc., Chicago,  
35  
36 IL) for our analysis. Demographic characteristics of the nurses were collected to report  
37  
38 sample information. Pearson’s correlation coefficients were calculated to estimate the  
39  
40 correlation between the exposure to WPV and compassionate behavior, psychological  
41  
42 stress, sleep quality, and self-subjective health status. A series of hierarchical linear  
43  
44 regression analyses were performed to examine our hypotheses according to a  
45  
46 procedure that was suggested by Baron and Kenny<sup>34</sup>. Analyzing mediation involved  
47  
48 three steps.<sup>35</sup> The first step is to establish that the independent variable influences the  
49  
50 mediator (*M2* and *M12*). The second step is to demonstrate that the independent  
51  
52  
53  
54  
55  
56  
57  
58  
59  
60

variable influences the dependent variables (*M4*, *M8*, *M14*, and *M18*). The third and last step is to demonstrate that the mediator influences the dependent variables (*M5*, *M9*, *M15*, and *M19*) when the independent variable is controlled (*M6*, *M10*, *M16*, and *M20*). In this final step, the effect of the independent variable on the dependent variables is significantly reduced when the mediator is in the model partially mediation is indicated<sup>36</sup>.

We provide values including F,  $R^2$  and  $R^2$ -changes, and the fit of the model was assessed with  $R^2$ . Standardized regression coefficients ( $\beta$ ) and P values were calculated for each step in the regression model. Statistical significance was defined as  $P < 0.05$  (two-tailed).

## RESULTS

### Demographic information of the sample

A summary of demographic variables can be seen in Table 1.

**Table 1 Characteristics of the Respondents (n = 1024)**

| Characteristic                      | N   | %    |
|-------------------------------------|-----|------|
| Age                                 |     |      |
| 20-30                               | 709 | 69.2 |
| 31-40                               | 253 | 24.7 |
| 41-50                               | 49  | 4.8  |
| 51+                                 | 4   | 0.4  |
| Missing value                       | 9   | 0.9  |
| Gender                              |     |      |
| Male                                | 87  | 8.5  |
| Female                              | 936 | 91.4 |
| Missing value                       | 1   | 0.1  |
| Education                           |     |      |
| Technical secondary school or below | 38  | 3.7  |
| College degree                      | 226 | 22.1 |
| Bachelor's degree or above          | 757 | 73.9 |
| Missing value                       | 3   | 0.3  |
| Marital status                      |     |      |

|                                  |     |      |
|----------------------------------|-----|------|
| Unmarried                        | 496 | 48.4 |
| Married                          | 507 | 49.5 |
| Divorced or loss of spouse       | 13  | 1.3  |
| Missing value                    | 8   | 0.8  |
| Professional categories          |     |      |
| Nurse                            | 355 | 34.7 |
| Nurse practitioner               | 473 | 46.2 |
| Nurse supervisor                 | 166 | 16.2 |
| Vice director/director of junior | 29  | 2.8  |
| Missing value                    | 1   | 0.1  |
| Type of work                     |     |      |
| work during the day              | 296 | 28.9 |
| night shifts                     | 726 | 71.0 |
| Missing value                    | 1   | 0.1  |

A summary of demographic variables can be seen in Table 1. As shown in Table 2, about 65.2% of participants reported that they had encountered verbal violence within the last 12 months, which is the most common type of WPV in hospitals. Other incidence rates of 16 WPV from highest to lowest are: difficult situations (54.5%), tarnished reputation (37.5%), mob behavior (34.9%), intimidation behavior (18.8%), physical violence (14.6%), and sexual harassment (5.9%).

**Table 2. The incidence rate and rank ordering of WPV against nurses within last 12 months (n = 1024)**

| Violence Styles       | N   | %    | Total | Rank |
|-----------------------|-----|------|-------|------|
| Verbal Violence       | 667 | 65.2 | 1023  | 1    |
| Made Difficulties     | 557 | 54.5 | 1022  | 2    |
| Smear Reputation      | 384 | 37.5 | 1023  | 3    |
| Mobbing Behavior      | 357 | 34.9 | 1022  | 4    |
| Intimidation Behavior | 192 | 18.8 | 1022  | 5    |
| Physical Violence     | 149 | 14.6 | 1023  | 6    |
| Sexual Harassment     | 60  | 5.9  | 1023  | 7    |

We aggregated the experience of the various types of WPV to ascertain the total number of incidents that occurred within the previous 12 months. As shown in Table 3, 75.4% of participants reported that they had experienced one or more types of WPV during the previous 12 months. Furthermore, 17.1%, 15.3%, 13.8%, 13%, 8.7%, 5.1%,

2.5% of participants reported that they had suffered one to seven types of violence, respectively.

**Table 3. Incidence rate of accumulated types of WPV against nurses within last 12 months (n = 1024)**

| Accumulated Violence | N   | %    | Valid Percent | Cumulative Percentages |
|----------------------|-----|------|---------------|------------------------|
| 0                    | 250 | 24.4 | 24.6          | 24.6                   |
| 1 type               | 174 | 16.8 | 17.1          | 41.7                   |
| 2 types              | 156 | 15.1 | 15.3          | 57.0                   |
| 3 types              | 140 | 13.5 | 13.8          | 70.7                   |
| 4 types              | 132 | 12.8 | 13            | 83.7                   |
| 5 types              | 89  | 8.6  | 8.7           | 92.4                   |
| 6 types              | 52  | 5    | 5.1           | 97.5                   |
| 7 types              | 25  | 2.4  | 2.5           | 100                    |

According to the coding criteria, the response “never” was coded as not having experienced compassionate behavior from their co-workers, supervisor and/or patients, thus, these responses were assigned a score of “0.” Other situations were assigned a “1” indicating that nurses had received compassionate behavior. As shown in Table 4, about 84.9% of participants reported that they had encountered compassionate behavior from their co-workers within the last 12 months, which was the highest incidence rate by source of compassionate behavior. The other incidence rates of compassionate behavior from highest to lowest are: from their co-workers (84.9%), from their supervisor (67.3%) and from their patients (65.3%).

**Table 4. The incidence rate and rank ordering of compassion experience nurses within last 12 months (n = 1024)**

| Compassion Styles     | N   | %    | Total | Rank |
|-----------------------|-----|------|-------|------|
| from their co-workers | 868 | 84.9 | 1022  | 1    |
| from their supervisor | 687 | 67.3 | 1021  | 2    |
| from their customer   | 666 | 65.3 | 1020  | 3    |

As shown in Table 5, 92.4% of participants reported that they had experienced one or more types of compassionate behavior during the previous 12 months, which indicated

that the prevalence of compassion toward nurses is 92.4%. Furthermore, 14.6% of participants reported that they had experienced compassionate behavior from one source, 30.3% from two sources, and 47.4% from all three sources.

**Table 5. Incidence rate of accumulated types of compassion experience nurses within last 12 months (n = 1024)**

| Accumulated Compassion | N   | %    | Valid Percent | Cumulative Percentages |
|------------------------|-----|------|---------------|------------------------|
| 0                      | 79  | 7.6  | 7.8           | 7.8                    |
| 1 types                | 148 | 14.3 | 14.6          | 22.3                   |
| 2 types                | 308 | 29.8 | 30.3          | 52.6                   |
| 3 types                | 482 | 46.6 | 47.4          | 100                    |

### Correlation between the variables

The mean, standard deviation, and Pearson's correlation coefficients of the continuous variables are presented in Table 6. All variables are significantly correlated to each other, WPV is negatively correlated to compassionate behavior ( $r = -0.224$ ,  $P < 0.01$ ), sleep quality ( $r = -0.194$ ,  $P < 0.01$ ), and subjective health status ( $r = -0.254$ ,  $P < 0.01$ ), and was positively correlated with stress ( $r = 0.302$ ,  $P < 0.01$ ). Compassionate behavior was positively correlated to sleep quality ( $r = 0.334$ ,  $P < 0.01$ ) and subjective health status ( $r = 0.346$ ,  $P < 0.01$ ), and was negatively correlated to stress ( $r = -0.234$ ,  $P < 0.01$ ). Stress was negatively correlated with sleep quality ( $r = -0.463$ ,  $P < 0.01$ ) and subjective health status ( $r = -0.463$ ,  $P < 0.01$ ). There was a positive correlation between sleep quality and subjective health status ( $r = 0.597$ ,  $P < 0.01$ ).

**Table 6. Means (M), standard deviations (SD) and correlations of variables (n = 1024)**

| Variables  | M     | SD    | N    | WPV      | Compassion | Stress | Sleeping Quality | Subjective Health Status |
|------------|-------|-------|------|----------|------------|--------|------------------|--------------------------|
| WPV        | 1.1   | 0.77  | 1018 | 1        |            |        |                  |                          |
| Compassion | 3.06  | 0.767 | 1017 | -0.224** | 1          |        |                  |                          |
| Stress     | 13.74 | 4.84  | 1008 | 0.302**  | -0.234**   | 1      |                  |                          |

|                          |      |       |      |          |         |          |         |   |
|--------------------------|------|-------|------|----------|---------|----------|---------|---|
| Sleeping Quality         | 2.38 | 0.793 | 1022 | -0.194** | 0.334** | -0.463** | 1       |   |
| Subjective Health Status | 2.58 | 0.708 | 1022 | -0.254** | 0.346** | -0.463** | 0.597** | 1 |

### Multiple linear hierarchical regression models

The results show that the exposure to WPV behavior significantly affected the psychological stress ( $\beta = 0.295$ ,  $P < 0.01$ ), sleep quality ( $\beta = -0.198$ ,  $P < 0.01$ ), and subjective health status ( $\beta = -0.252$ ,  $P < 0.01$ ) of nurses. The exposure to compassionate behavior significantly affected the psychological stress ( $\beta = -0.229$ ,  $P < 0.01$ ), sleep quality ( $\beta = 0.326$ ,  $P < 0.01$ ), and subjective health status ( $\beta = 0.342$ ,  $P < 0.01$ ) of nurses. The results of the mediation analysis showed that psychological stress is a partial mediator in the relationship between violence and sleep quality ( $\beta = -0.458$ ,  $P < 0.01$ ) and between violence and subjective health ( $\beta = -0.425$ ,  $P < 0.01$ ) as shown in Table 7. Moreover, psychological stress also partially mediated the relationship between compassionate behavior and sleep quality ( $\beta = -0.473$ ,  $P < 0.01$ ), and between compassionate behavior and subjective health ( $\beta = -0.405$ ,  $P < 0.01$ ) as shown in Table 8.

1  
2  
3  
4  
5  
6  
7  
8  
9  
10  
11  
12  
13  
14  
15  
16  
17  
18  
19  
20  
21  
22  
23  
24  
25  
26  
27  
28  
29  
30  
31  
32  
33  
34  
35  
36  
37  
38  
39  
40  
41  
42  
43  
44  
45  
46  
47

**Table 7. Multiple hierarchical linear regression models of variables (WPV, Psychological stress, Sleep quality, Subjective health). (n = 1024).**

| Variables                   | Psychological stress |          |        | Sleep quality |          |          | Subjective health |          |          |          |
|-----------------------------|----------------------|----------|--------|---------------|----------|----------|-------------------|----------|----------|----------|
|                             | M1                   | M2       | M3     | M4            | M5       | M6       | M7                | M8       | M9       | M10      |
| <b>Control Variables</b>    |                      |          |        |               |          |          |                   |          |          |          |
| Age                         | 0.013                | -0.022   | -0.028 | -0.005        | -0.021   | -0.015   | -0.067            | -0.037   | -0.058   | -0.046   |
| Gender                      | 0.055                | 0.043    | -0.005 | 0.004         | 0.022    | 0.023    | -0.013            | -0.002   | 0.12     | 0.016    |
| Service Years               | 0.034                | 0.009    | -0.063 | -0.046        | -0.044   | -0.041   | -0.103            | -0.081   | -0.087   | -0.078   |
| Education                   | -0.003               | 0.003    | -0.024 | -0.027        | -0.024   | -0.025   | -0.02             | -0.025   | -0.025   | -0.024   |
| Marital status              | 0.079                | 0.04     | 0.037  | 0.063         | 0.073    | 0.082    | -0.01             | 0.023    | 0.024    | 0.04     |
| Professional categories     | 0.069                | 0.58     | -0.062 | -0.055        | -0.032   | -0.028   | -0.026            | -0.016   | 0.002    | 0.008    |
| <b>Mediating variable</b>   |                      |          |        |               |          |          |                   |          |          |          |
| Psychological stress        |                      |          |        |               | -0.474** | -0.458** |                   |          | -0.463** | -0.425** |
| <b>Independent variable</b> |                      |          |        |               |          |          |                   |          |          |          |
| WPV                         |                      | 0.295**  |        | -0.198**      |          | -0.063** |                   | -0.252** |          | -0.127** |
| F                           | 2.493*               | 15.578** | 1.441  | 6.92**        | 42.645** | 38.193** | 1.922             | 11.142** | 40.953** | 38.19**  |
| R <sup>2</sup>              | 0.015*               | 0.099**  | 0.009  | 0.047**       | 0.23**   | 0.229**  | 0.011             | 0.073**  | 0.223**  | 0.236**  |
| ΔR <sup>2</sup>             | 0.015*               | 0.084**  | 0.009  | 0.038**       | 0.221**  | 0.003**  | 0.011             | 0.061**  | 0.211**  | 0.014**  |

\*p<0.05\*\*p<0.01,

**Table 8. Multiple hierarchical linear regression models of variables (Compassion, Psychological stress, Sleep quality, Subjective health). (n = 1024)**

| Variables                   | Psychological stress |          | Sleep quality |          |          |          | Subjective health |          |          |          |
|-----------------------------|----------------------|----------|---------------|----------|----------|----------|-------------------|----------|----------|----------|
|                             | M11                  | M12      | M13           | M14      | M15      | M16      | M17               | M18      | M19      | M20      |
| <b>Control Variables</b>    |                      |          |               |          |          |          |                   |          |          |          |
| Age                         | 0.009                | -0.007   | -0.025        | -0.002   | -0.021   | -0.021   | -0.061            | -0.037   | -0.058   | -0.04    |
| Gender                      | 0.05                 | 0.061    | 0.002         | -0.013   | 0.022    | 0.026    | -0.008            | -0.024   | 0.012    | 0.001    |
| Service Years               | 0.037                | 0.017    | -0.61         | -0.033   | -0.044   | -0.043   | -0.102            | -0.073   | -0.087   | -0.066   |
| Education                   | 0.002                | 0.018    | -0.023        | -0.047   | -0.024   | -0.022   | -0.025            | -0.5     | -0.025   | -0.043   |
| Marital status              | 0.081                | 0.083    | 0.036         | 0.033    | 0.073    | 0.074    | -0.013            | -0.016   | 0.024    | 0.018    |
| Professional categories     | 0.071                | 0.049    | -0.064        | -0.033   | -0.032   | -0.03    | -0.03             | -0.003   | 0.002    | 0.023    |
| <b>Mediating variable</b>   |                      |          |               |          |          |          |                   |          |          |          |
| Psychological stress        |                      |          |               |          | -0.474** | -0.473** |                   |          | -0.315** | -0.405** |
| <b>Independent variable</b> |                      |          |               |          |          |          |                   |          |          |          |
| Compassion                  |                      | -0.229** |               | 0.326**  |          | 0.229**  |                   | 0.342**  |          | 0.249**  |
| <i>F</i>                    | 2.515                | 10.097** | 1.441         | 17.944** | 42.645** | 47.592** | 1.936             | 20.433** | 40.953** | 48.008** |
| <i>R</i> <sup>2</sup>       | 0.015                | 0.066**  | 0.009         | 0.112**  | 0.23**   | 0.278**  | 0.012             | 0.126**  | 0.223**  | 0.279**  |
| $\Delta R^2$                | 0.015                | 0.051**  | 0.009         | 0.104**  | 0.221**  | 0.049**  | 0.012             | 0.114**  | 0.211**  | 0.058**  |

\* $p < 0.05$  \*\* $p < 0.01$ ,



## DISCUSSION

Approximately 75.4% of survey participants reported they had experienced some form of WPV, and nearly 70% experienced multiple forms of violence types. Compared with the United States, WPV is more serious in Chinese nursing workplaces.<sup>14</sup> Compared with other professions, nurses have higher rates of non-fatal workplace assault injuries.<sup>11</sup> Our results show that 92.4% of participants received compassionate behavior from their co-workers, supervisors and/or work itself. Approximately 50% of the participants received compassionate behavior from all three sources. It is shown that compassionate behavior in medical organizations is common. In the nursing workplace, the incidents of both WPV and compassionate behavior are high.

### **The influence of WPV on health outcomes**

This study is consistent with findings from prior research. The exposure to WPV has a significant influence on work stress and health outcomes among nurses.<sup>37</sup> This study also presents a new theoretical contribution, which shows that the exposure to WPV has a direct and indirect effect on the health outcomes of nurses. Moreover, work stress has a partially mediating effect on their relationship. High job stress caused by WPV may result in poor sleep quality and negatively affect physical and psychological health.

Namely, WPV reduced subjective sleep quality and subjective health status by elevating the work stress of nurses. Previous studies showed that 82.33% of nurses performing shift work experienced poor sleep quality.<sup>16</sup> Nurses who experienced WPV have emotional fluctuations, increased anxiety about their jobs, and even reported waking up intermittently at night, which decreased their sleep quality.<sup>16</sup> Violent incidents might

1  
2  
3 result in some serious adverse effects on emotions, cognitive processing, increasing  
4 nurses' workload on taking care of hospitalized patients, which further elevates stress  
5  
6 among nurses, reducing sleep quality, increasing fatigue and weakness in their daily  
7  
8 lives, thereby reducing the overall quality of their work and life. Sleep deprivation not  
9  
10 only results in nursing errors and accidents, but can also affect nurses' personal  
11  
12 health.<sup>38</sup> WPV and their influence lead to negative effect on both physical and mental  
13  
14 health for nurses under a long circle.  
15  
16  
17  
18  
19

### 20 **The influence of compassionate behavior on health outcomes**

21  
22 This study found that high levels of compassionate behavior at work was significantly  
23 associated with nurses' health outcomes. As indicated in previous studies,<sup>39</sup>  
24  
25 compassionate behavior at work was beneficial in improving subjective sleep quality  
26  
27 and subjective health status. It was shown that nurses who experienced compassionate  
28  
29 behavior at work reported a higher score on their subjective sleep quality and subjective  
30  
31 health status than those who did not. Result suggested that the compassionate behaviors  
32  
33 contributed to the promotion of positive health outcomes. Compassionate behavior at  
34  
35 work such as daily interactions, careful listening, and respecting privacy prompted  
36  
37 nurses to hold positive feelings<sup>40</sup> and conscious emotional experiences that stimulate  
38  
39 cognitive processing after certain outcomes or behaviors.<sup>40</sup> Jane E. Dutton found that  
40  
41 acts of compassion created renewable resources of trust, quality connections, positive  
42  
43 emotions, reaffirm shared values of dignity, and mutual respect. She confirmed that  
44  
45 small interpersonal actions could have large system-wide effects.<sup>29</sup> In fact, nurses,  
46  
47 tiring from their work, can be satisfied with expressions of love and care from others,  
48  
49  
50  
51  
52  
53  
54  
55  
56  
57  
58  
59  
60

1  
2  
3 and thus, compassionate behavior at work may help nurses balance their emotion  
4  
5  
6 conflicts. Thus, they are more willing to devote themselves to their career, maintain a  
7  
8 positive attitude in facing work challenges, and actively solve work problems.  
9

10  
11 Compassion as a form of care in the workplace is simple but works well to release  
12  
13 pressure and anxiety among nurses. It contributes to nurses' sleep quality and health  
14  
15 status (i.e., receiving different forms of compassionate behavior can help to achieve  
16  
17 healthy outcomes through the mediating role of psychological stress). Compassionate  
18  
19 behavior helps nurses remain empathetic and compassionate professionals and improve  
20  
21 the development of nursing, face work pressure, work overloads and challenges in their  
22  
23 daily nursing tasks.  
24  
25  
26

### 27 28 **Limitations**

29  
30 Although some significant discoveries were presented in this study, there are several  
31  
32 limitations that must be mentioned. First, a convenience sample was used in this  
33  
34 study, which risks a potential problem of a sampling bias. Moreover, a total of 1,024  
35  
36 nurses is a small sample when compared to the entire Chinese nurse population. Thus,  
37  
38 the findings cannot be generalized to Chinese nurses in general. Second, a  
39  
40 cross-sectional nature was not helpful in establishing a causal relationship between  
41  
42 WPV, compassionate behavior, stress, sleep quality, and subjective health status.  
43  
44 Thus, an important direction for future research is longitudinal studies. Third, the data  
45  
46 was self-reported by the nurses, and to some extent, may have resulted in a response  
47  
48 bias from social desirability or negative affect. Nurses may have overestimated or  
49  
50 underestimated the association between study variables. We used foreign design  
51  
52  
53  
54  
55  
56  
57  
58  
59  
60

1  
2  
3 scales that ignored cross-cultural adaptability in this study, thus, this area is worth  
4  
5 attracting academic attention in the future. Fourth, the method of measurement of  
6  
7 sleep quality is very poor, which we admit is a limitation of the study.  
8  
9

## 10 **CONCLUSION**

11  
12 In this survey, a total of 75.4% participants reported they had experienced some form of  
13  
14 exposure to WPV. About 92.4% experienced compassionate behavior from their  
15  
16 co-workers, supervisor, or patients. Exposure to WPV has a significantly negative  
17  
18 influence on the work stress and health outcomes of nurses. This study also makes a  
19  
20 new theoretical contribution by showing that the exposure to WPV not only has a direct  
21  
22 effect, but also an indirect effect on the health outcomes of nurses. Work stress had a  
23  
24 partially mediating effect on their relationship. High levels of compassionate behavior  
25  
26 at work was significantly associated with health outcomes among nurses, as reported in  
27  
28 previous studies. Compassionate behavior was beneficial in improving subjective sleep  
29  
30 quality and subjective health status. There is room for improvement to relieve exposure  
31  
32 to WPV by lowering the work stress of nurses. A harmonious work environment for  
33  
34 nurses should be provided as the damage to health outcomes due to WPV is clear.  
35  
36

37 **ACKNOWLEDGMENTS:** The authors thanks the participants at Harbin Medical  
38  
39 University for their support, and give their sincere thanks to all participants who had  
40  
41 helped collect data and distribute questionnaires to other subjects.  
42  
43

44 **FUNDINGS:** This study was funded by the Innovation Science Research Foundation  
45  
46 of Harbin Medical University (2016RWZX09) to Tao Sun and also was funded by the  
47  
48 Natural Science Foundation of China (71473063) to Fan Lihua. The authors give their  
49  
50 sincere thanks to all participants who had helped collect data and distribute  
51  
52 questionnaires to other subjects.  
53  
54  
55  
56  
57  
58  
59  
60

## FUNDINGS

This study was funded by the Innovation Science Research Foundation of Harbin Medical University (2016RWZX09) to Tao Sun and also was funded by the Natural Science Foundation of China (71473063) to Fan Lihua. The authors give their sincere thanks to all participants who had helped collect data and distribute questionnaires to other subjects.

**AUTHOR CONTRIBUTION:** Conceived and designed the experiments: LF TS WL SZ. Performed the experiments: SZ WL JW YS FX. Analyzed the data: TS WL SZ. Contributed reagents/materials/analysis tools: WL SZ SC. Wroten the paper: SZ WL TS.

**COMPETING INTERESTS:** The authors have declared that no competing interests exist.

**DATA SHARING STATEMENT:** No additional data are available.

## REFERENCES

1. Gómezgarcía T, Ruzafamartínez M, Fuentelsazgallego C, et al. Nurses' sleep quality, work environment and quality of care in the Spanish National Health System: observational study among different shifts. *Bmj Open* 2016;6(8):e012073.
2. Magnavita N. The exploding spark: workplace violence in an infectious disease hospital--a longitudinal study. *BioMed Research International*,2013,(2013-7-11) 2013;2013(3):247-61.
3. Jiao M, Ning N, Li Y, et al. Workplace violence against nurses in Chinese hospitals: a cross-sectional survey. *Bmj Open* 2015;5(3):e006719.
4. Kaya S, Bilgin Dİ, Karsavuran S, et al. Violence Against Doctors and Nurses in Hospitals in Turkey. *Journal of Forensic Nursing* 2016;12(1):26-34.
5. Zeng JY, An FR, Xiang YT, et al. Frequency and risk factors of workplace violence on psychiatric nurses and its impact on their quality of life in China. *Psychiatry Research* 2013;210(2):510-14.
6. Gerberich SG, Church TR, Mcgovern PM, et al. An epidemiological study of the magnitude and consequences of work related violence: the Minnesota Nurses' Study. *Occupational & Environmental Medicine* 2004;61(6):495.
7. Henneman EA, Roche JP, Fisher DL, et al. Error identification and recovery by student nurses using human patient simulation: Opportunity to improve patient safety. *Applied Nursing Research* 2010;23(1):11-21.

- 1
- 2
- 3 8. Zampieron A, Galeazzo M, Turra S, et al. Perceived aggression towards nurses: study in two Italian
- 4 health institutions. *Journal of Clinical Nursing* 2010;19(15 - 16):2329-41.
- 5 9. Magnavita N. Workplace violence and occupational stress in healthcare workers: a chicken-and-egg
- 6 situation-results of a 6-year follow-up study. *Journal of Nursing Scholarship*
- 7 2014;46(5):366–76.
- 8 10. Ying XD, Zhao LY, Wen GM. Status and affected factors of work stress among nurse. *Industrial*
- 9 *Health & Occupational Diseases* 2016
- 10 11. Stansfeld SA, Pike C, Mcmanus S, et al. Occupations, work characteristics and common mental
- 12 disorder. *Psychological Medicine* 2013;43(5):961.
- 13 12. Chu LC. Mediating positive moods: the impact of experiencing compassion at work. *J Nurs Manag*
- 14 2016;24(1):59-69.
- 15 13. Frost PJ. Why Compassion Counts! *Journal of Management Inquiry* 2011;20(4):395-401.
- 16 14. Lilius JM, Worline MC, Maitlis S, et al. The Contours and Consequences of Compassion at Work.
- 17 *Journal of Organizational Behavior* 2008;29(2):193-218.
- 18 15. Mannion G. Compassion as the Fundamental Basis of Morality. *Continuum* 2008
- 19 16. Lin SH, Liao WC, Chen MY, et al. The impact of shift work on nurses' job stress, sleep quality and
- 20 self-perceived health status. *J Nurs Manag* 2012;22(5):604-12.
- 21 17. Hertig VL, Cain KC, Jarrett ME, et al. Daily stress and gastrointestinal symptoms in women with
- 22 irritable bowel syndrome. *Nursing Research* 2007;56(6):399.
- 23 18. Magnavita N. Mutual relationship between workplace violence and stress: Nicola Magnavita.
- 24 *European Journal of Public Health* 2016;26(suppl\_1)
- 25 19. Nicola Magnavita MD, Heponiemi T. Workplace Violence Against Nursing Students and Nurses: An
- 26 Italian Experience. *Journal of Nursing Scholarship* 2011;43(2):203–10.
- 27 20. Garrosa E, Moreno-Jiménez B, Liang Y, et al. The relationship between socio-demographic
- 28 variables, job stressors, burnout, and hardy personality in nurses: an exploratory study.
- 29 *International Journal of Nursing Studies* 2008;45(3):418-27.
- 30 21. Bang YE, Park B. The Effects of Nursing Work Environment and Job Stress on Health Problems of
- 31 Hospital Nurses. 2016:227-37.
- 32 22. Gershon RR, Stone PW, Zeltser M, et al. Organizational climate and nurse health outcomes in the
- 33 United States: a systematic review. *Industrial Health* 2007;45(5):622-36.
- 34 23. Magnavita N, Garbarino S. Sleep, Health and Wellness at Work: A Scoping Review. *International*
- 35 *Journal of Environmental Research & Public Health* 2017;14(11):1347.
- 36 24. Svedberg P, Lichtenstein P, Pedersen NL. Age and Sex Differences in Genetic and Environmental
- 37 Factors for Self-Rated Health: A Twin Study. *The Journals of Gerontology: Series B*
- 38 2001;56(3):S171-8.
- 39 25. Shiu S. The Sleep Quality and Its Related Factors in the Hospital Nurses. 2006
- 40 26. Sun T, Gao L, Li F, et al. Workplace violence, psychological stress, sleep quality and subjective
- 41 health in Chinese doctors: a large cross-sectional study. *Bmj Open* 2017;7(12):e017182.
- 42 27. Cohen J, Stuenkel D, Nguyen Q. Providing a healthy work environment for nurses: the influence on
- 43 retention. *Journal of Nursing Care Quality* 2009;24(4):308.
- 44 28. Wen J, Cheng Y, Hu X, et al. Workload, burnout, and medical mistakes among physicians in China:
- 45 A cross-sectional study. *Bioscience trends* 2016;10(1):27-33.
- 46 29. Zhang Ding, Lu Dan, Shi Yu, et al. Impact of Patients Violence in Public Hospital on Job Burnout of
- 47 Nurses. *Chinese Hospital Management* 2016;36(9):69-71.(In Chinese).
- 48
- 49
- 50
- 51
- 52
- 53
- 54
- 55
- 56
- 57
- 58
- 59
- 60

- 1  
2  
3 30. Kivimäki M, M Virtanen, M Vartia, et al. Workplace bullying and the risk of cardiovascular disease  
4 and depression. *Occupational & Environmental Medicine* 2003;60(10):779-83.  
5 31. Wanous JP, Reichers AE, Hudy MJ. Overall job satisfaction: how good are single-item measures?  
6 *Journal of Applied Psychology* 1997;82(2):247-52.  
7 32. Buysse DJ, Reynolds CF, Monk TH, et al. The Pittsburgh Sleep Quality Index: a new instrument for  
8 psychiatric practice and research. *Psychiatry research* 1989;28(2):193-213.  
9 33. Fein EC, Skinner N. Clarifying the effect of work hours on health through work–life conflict. *Asia*  
10 *Pacific Journal of Human Resources* 2015;53(4):448-70.  
11 34. Baron RM, Kenny DA. The moderator–mediator variable distinction in social psychological  
12 research: Conceptual, strategic, and statistical considerations. *J Pers Soc Psychol*  
13 1986;51(6):1173-82.  
14 35. Lajunen T, Parker D, Stradling SG. Dimensions of driver anger, aggressive and highway code  
15 violations and their mediation by safety orientation in UK drivers. *Transportation Research*  
16 *Part F Traffic Psychology & Behaviour* 1998;1(2):107-21.  
17 36. Zhao X, Lynch JG, Chen Q. Reconsidering Baron and Kenny: Myths and Truths about Mediation  
18 Analysis. *Journal of Consumer Research* 2010;37(2):197-206.  
19 37. Lin YH, Liu HE. The impact of workplace violence on nurses in South Taiwan. *International Journal*  
20 *of Nursing Studies* 2005;42(7):773.  
21 38. Tuckett THA. Connecting Leisure-Time Physical Activity and Quality of Sleep to Nurse Health:  
22 Data from the e-Cohort Study of Nurses and Midwives. *Journal of Nursing & Care* 2015;4  
23 39. Phillips JL, Davidson PM, Ollerton R, et al. A survey of commitment and compassion among nurses  
24 in residential aged care. *International Journal of Palliative Nursing* 2016;13(6):282-90.  
25 40. Baumeister RF, Vohs KD, Dewall CN, et al. How emotion shapes behavior: feedback, anticipation,  
26 and reflection, rather than direct causation. *Personality & Social Psychology Review*  
27 2007;11(2):167-203.  
28  
29  
30  
31  
32  
33  
34  
35  
36  
37  
38  
39  
40  
41  
42  
43  
44  
45  
46  
47  
48  
49  
50  
51  
52  
53  
54  
55  
56  
57  
58  
59  
60

**STROBE 2007 (v4) Statement—Checklist of items that should be included in reports of *cross-sectional studies***

| Section/Topic                | Item # | Recommendation                                                                                                                                                                       | Reported on page #             |
|------------------------------|--------|--------------------------------------------------------------------------------------------------------------------------------------------------------------------------------------|--------------------------------|
| Title and abstract           | 1      | (a) Indicate the study's design with a commonly used term in the title or the abstract                                                                                               | Page 1, line 24-30;            |
|                              |        | (b) Provide in the abstract an informative and balanced summary of what was done and what was found                                                                                  | P.1; line 31; p.2, line 1-14   |
| <b>Introduction</b>          |        |                                                                                                                                                                                      |                                |
| Background/rationale         | 2      | Explain the scientific background and rationale for the investigation being reported                                                                                                 | p.3, line 2-22; p.5, line 1-4  |
| Objectives                   | 3      | State specific objectives, including any prespecified hypotheses                                                                                                                     | P.5, line 5-9;                 |
| <b>Methods</b>               |        |                                                                                                                                                                                      |                                |
| Study design                 | 4      | Present key elements of study design early in the paper                                                                                                                              | P.5, line 8-9                  |
| Setting                      | 5      | Describe the setting, locations, and relevant dates, including periods of recruitment, exposure, follow-up, and data collection                                                      | p.5, line 10-17                |
| Participants                 | 6      | (a) Give the eligibility criteria, and the sources and methods of selection of participants                                                                                          | P.7, line 10-17                |
| Variables                    | 7      | Clearly define all outcomes, exposures, predictors, potential confounders, and effect modifiers. Give diagnostic criteria, if applicable                                             | no                             |
| Data sources/<br>measurement | 8*     | For each variable of interest, give sources of data and details of methods of assessment (measurement). Describe comparability of assessment methods if there is more than one group | p.6, line 7-22; p.7, line 1-11 |
| Bias                         | 9      | Describe any efforts to address potential sources of bias                                                                                                                            | no                             |
| Study size                   | 10     | Explain how the study size was arrived at                                                                                                                                            | no                             |
| Quantitative variables       | 11     | Explain how quantitative variables were handled in the analyses. If applicable, describe which groupings were chosen and why                                                         | P.7, line 12-20                |



|                     |     |                                                                                                                                                                                                              |                                  |
|---------------------|-----|--------------------------------------------------------------------------------------------------------------------------------------------------------------------------------------------------------------|----------------------------------|
| Statistical methods | 12  | (a) Describe all statistical methods, including those used to control for confounding                                                                                                                        | P.7, line 12-20                  |
|                     |     | (b) Describe any methods used to examine subgroups and interactions                                                                                                                                          | no                               |
|                     |     | (c) Explain how missing data were addressed                                                                                                                                                                  | no                               |
|                     |     | (d) If applicable, describe analytical methods taking account of sampling strategy                                                                                                                           | P.7, line 12-20                  |
|                     |     | (e) Describe any sensitivity analyses                                                                                                                                                                        | no                               |
| <b>Results</b>      |     |                                                                                                                                                                                                              |                                  |
| Participants        | 13* | (a) Report numbers of individuals at each stage of study—eg numbers potentially eligible, examined for eligibility, confirmed eligible, included in the study, completing follow-up, and analysed            | P.7, line 1-33                   |
|                     |     | (b) Give reasons for non-participation at each stage                                                                                                                                                         | no                               |
|                     |     | (c) Consider use of a flow diagram                                                                                                                                                                           | No                               |
| Descriptive data    | 14* | (a) Give characteristics of study participants (eg demographic, clinical, social) and information on exposures and potential confounders                                                                     | P.8; p.9;p.10line 1-20           |
|                     |     | (b) Indicate number of participants with missing data for each variable of interest                                                                                                                          | P.8; p.9                         |
| Outcome data        | 15* | Report numbers of outcome events or summary measures                                                                                                                                                         | P.8; p.9; p.10; p.11,            |
| Main results        | 16  | (a) Give unadjusted estimates and, if applicable, confounder-adjusted estimates and their precision (eg, 95% confidence interval). Make clear which confounders were adjusted for and why they were included | p.13; p.14                       |
|                     |     | (b) Report category boundaries when continuous variables were categorized                                                                                                                                    | no                               |
|                     |     | (c) If relevant, consider translating estimates of relative risk into absolute risk for a meaningful time period                                                                                             | no                               |
| Other analyses      | 17  | Report other analyses done—eg analyses of subgroups and interactions, and sensitivity analyses                                                                                                               | no                               |
| <b>Discussion</b>   |     |                                                                                                                                                                                                              |                                  |
| Key results         | 18  | Summarise key results with reference to study objectives                                                                                                                                                     | p.17;15-22<br>p.15;p.16;p.17line |

|                          |    |                                                                                                                                                                            |                         |
|--------------------------|----|----------------------------------------------------------------------------------------------------------------------------------------------------------------------------|-------------------------|
|                          |    |                                                                                                                                                                            | 1-3                     |
| Limitations              | 19 | Discuss limitations of the study, taking into account sources of potential bias or imprecision. Discuss both direction and magnitude of any potential bias                 | P.17, Line 4-14;        |
| Interpretation           | 20 | Give a cautious overall interpretation of results considering objectives, limitations, multiplicity of analyses, results from similar studies, and other relevant evidence | p.15; p.16;p.17line 1-3 |
| Generalisability         | 21 | Discuss the generalisability (external validity) of the study results                                                                                                      | no                      |
| <b>Other information</b> |    |                                                                                                                                                                            |                         |
| Funding                  | 22 | Give the source of funding and the role of the funders for the present study and, if applicable, for the original study on which the present article is based              | P.18, line 8-11         |

\*Give information separately for cases and controls in case-control studies and, if applicable, for exposed and unexposed groups in cohort and cross-sectional studies.

**Note:** An Explanation and Elaboration article discusses each checklist item and gives methodological background and published examples of transparent reporting. The STROBE checklist is best used in conjunction with this article (freely available on the Web sites of PLoS Medicine at <http://www.plosmedicine.org/>, Annals of Internal Medicine at <http://www.annals.org/>, and Epidemiology at <http://www.epidem.com/>). Information on the STROBE Initiative is available at [www.strobe-statement.org](http://www.strobe-statement.org).
